# Supplementary material for: Frailty in middle age is associated with frailty status and race-specific changes to the transcriptome
Source: Aging (Albany NY). 2019 Aug 8;11(15):5518–34. doi: 10.18632/aging.102135 (PMC6710041; doi:10.18632/aging.102135)
Supplement: Supplementary Table 1 [file aging-11-102135-s007.xlsx]

## Sheet: Supp Table 
Supplementary Table 1. Genes significantly different between non-frail and frail individuals.
Gene name	log2(fold change)	p value	q value
HP	2.98488	0.0004	0.00220905
LOC100505550	2.46667	0.00035	0.00197564
LOC100505530	2.43501	5e-05	0.000370102
FAM154B	2.39182	5e-05	0.000370102
DNLZ	2.25428	5e-05	0.000370102
LOC100506006	2.24898	0.0183	0.0497157
CDKN3	2.19295	5e-05	0.000370102
CRYBB2	2.17923	0.00095	0.00452522
SNORD116-1	2.17092	0.01465	0.0414577
LOC100506686	2.15444	0.00085	0.00413749
CROCCP2	2.14439	5e-05	0.000370102
PPP1R14A	2.11429	0.0002	0.00123235
CDRT15P1	2.10813	5e-05	0.000370102
PTRH2	2.09285	5e-05	0.000370102
MYOM2	2.08206	5e-05	0.000370102
LOC100506596	2.0715	0.001	0.00472422
HIST1H3G	2.04442	5e-05	0.000370102
EXOSC4	2.03342	5e-05	0.000370102
GRAPL	1.99345	0.00105	0.0049133
CHMP2A	1.97258	5e-05	0.000370102
CAHM	1.95839	5e-05	0.000370102
LOC729732	1.95358	5e-05	0.000370102
LOC100507111	1.92901	5e-05	0.000370102
SSSCA1	1.8985	5e-05	0.000370102
AKR1C3	1.86465	5e-05	0.000370102
CBR3	1.84867	5e-05	0.000370102
AP1S1	1.84389	5e-05	0.000370102
TXLNG2P	1.83073	5e-05	0.000370102
LOC100652935	1.83058	5e-05	0.000370102
LOC387895	1.81714	5e-05	0.000370102
CHCHD1	1.78503	5e-05	0.000370102
HEATR7A	1.77889	5e-05	0.000370102
LOC100507258	1.76461	5e-05	0.000370102
USE1	1.7645	5e-05	0.000370102
LOC100652913	1.76027	5e-05	0.000370102
OBFC2B	1.74455	5e-05	0.000370102
RAB34	1.74234	5e-05	0.000370102
THOC6	1.73638	5e-05	0.000370102
CCDC144A	1.73553	5e-05	0.000370102
RLN2	1.73212	0.0042	0.0152456
HRASLS2	1.71939	0.00735	0.0237424
EP400NL	1.71765	5e-05	0.000370102
CARD17	1.7016	0.0015	0.00662132
C1orf31	1.69649	5e-05	0.000370102
MYL6B	1.68661	5e-05	0.000370102
EIF4E2	1.68374	5e-05	0.000370102
C11orf67	1.6771	5e-05	0.000370102
NDUFS6	1.66826	5e-05	0.000370102
LOC100505622	1.6655	5e-05	0.000370102
LOC100505737	1.66468	0.00025	0.00149761
RPL23	1.6554	5e-05	0.000370102
CCDC12	1.65331	5e-05	0.000370102
JOSD2	1.6522	5e-05	0.000370102
GPR55	1.65024	5e-05	0.000370102
OCIAD2	1.64253	5e-05	0.000370102
HP07349	1.64117	0.00115	0.00529146
LOC100128420	1.6318	0.0029	0.0112429
TOMM6	1.62702	5e-05	0.000370102
RPS4Y1	1.62549	5e-05	0.000370102
CLEC1B	1.61718	5e-05	0.000370102
TMEM204	1.61454	5e-05	0.000370102
TNNT1	1.61306	5e-05	0.000370102
MTRNR2L9	1.61112	0.0004	0.00220905
LOC388796	1.61085	5e-05	0.000370102
HERC2P10	1.60523	5e-05	0.000370102
LIN7B	1.59667	0.00035	0.00197564
ELMO3	1.59344	5e-05	0.000370102
SNHG7	1.59017	5e-05	0.000370102
SNRPA1	1.59008	5e-05	0.000370102
FAM24B	1.58838	5e-05	0.000370102
MICA	1.58651	5e-05	0.000370102
EEF1DP3	1.58404	5e-05	0.000370102
LOC100505613	1.58303	0.0004	0.00220905
HIST1H2AJ	1.58227	5e-05	0.000370102
IFI30	1.57431	5e-05	0.000370102
C3orf35	1.56042	5e-05	0.000370102
EEF1D	1.55999	5e-05	0.000370102
C19orf59	1.55864	5e-05	0.000370102
TMEM223	1.55065	5e-05	0.000370102
C12orf45	1.5496	5e-05	0.000370102
ELOF1	1.54612	5e-05	0.000370102
DBI	1.54608	5e-05	0.000370102
LOC100509780	1.54601	0.0162	0.0451127
LOC285326	1.54344	0.0097	0.029574
C2orf74	1.54242	5e-05	0.000370102
LOC100506159	1.5312	0.0079	0.0251945
ATP5E	1.53099	5e-05	0.000370102
RNU11	1.52578	5e-05	0.000370102
SPAG16	1.52571	5e-05	0.000370102
S100Z	1.52236	5e-05	0.000370102
INGX	1.52099	5e-05	0.000370102
IGJ	1.5198	5e-05	0.000370102
PTGDS	1.51574	5e-05	0.000370102
LOC606724	1.51387	5e-05	0.000370102
TRMT112	1.51111	5e-05	0.000370102
FAM81B	1.5103	0.00025	0.00149761
LOC100131234	1.51022	5e-05	0.000370102
LOC100505899	1.50309	5e-05	0.000370102
ASRGL1	1.50198	5e-05	0.000370102
SNORA57	1.50131	5e-05	0.000370102
DCXR	1.49967	5e-05	0.000370102
LOC100132111	1.499	5e-05	0.000370102
C12orf65	1.49731	5e-05	0.000370102
SNRNP70	1.49674	5e-05	0.000370102
LOC401847	1.49293	0.0102	0.030792
SULT1A1	1.47743	5e-05	0.000370102
CYB5A	1.4698	5e-05	0.000370102
MTRNR2L10	1.46661	5e-05	0.000370102
TMEM150B	1.46621	5e-05	0.000370102
STX4	1.46492	5e-05	0.000370102
CD82	1.45841	5e-05	0.000370102
RNASE2	1.45798	5e-05	0.000370102
MRPL27	1.45155	5e-05	0.000370102
NBPF9	1.451	5e-05	0.000370102
LOC100506538	1.44983	0.00055	0.00288713
AIFM1	1.44437	5e-05	0.000370102
H1F0	1.43329	5e-05	0.000370102
CFDP1	1.43175	5e-05	0.000370102
LOC100294406	1.43032	0.0066	0.0217998
PFDN2	1.42796	0.0004	0.00220905
ZNF622	1.4263	5e-05	0.000370102
RBP5	1.42454	5e-05	0.000370102
NAPRT1	1.42172	5e-05	0.000370102
LOC653720	1.41912	0.01065	0.0319268
PFDN6	1.41675	5e-05	0.000370102
MCEE	1.41567	5e-05	0.000370102
IFT27	1.4144	5e-05	0.000370102
GPR15	1.41387	5e-05	0.000370102
TRAPPC6A	1.4095	5e-05	0.000370102
CYC1	1.40915	5e-05	0.000370102
SCARNA9	1.40814	5e-05	0.000370102
HNRNPA1	1.4065	5e-05	0.000370102
KLHL14	1.40557	5e-05	0.000370102
SURF2	1.40519	5e-05	0.000370102
LOC100652736	1.40307	5e-05	0.000370102
SNORD116-20	1.40187	0.01295	0.0375327
LOC100506804	1.40159	0.0002	0.00123235
CNTNAP2	1.3966	5e-05	0.000370102
MTRNR2L6	1.39591	5e-05	0.000370102
RNU6ATAC	1.39495	5e-05	0.000370102
IFI27L1	1.3918	0.0002	0.00123235
EPSTI1	1.38965	5e-05	0.000370102
HIST1H4J	1.38886	5e-05	0.000370102
NBR2	1.38882	5e-05	0.000370102
PPA1	1.38762	5e-05	0.000370102
LOC642826	1.38476	5e-05	0.000370102
RTP4	1.38213	5e-05	0.000370102
HSPE1	1.38071	0.0011	0.00510741
C11orf75	1.38046	5e-05	0.000370102
AUH	1.37759	5e-05	0.000370102
MT1E	1.37667	0.0014	0.006256
C3orf54	1.3757	5e-05	0.000370102
MTRNR2L3	1.37116	0.0037	0.013764
LOC100652802	1.36937	0.0003	0.00173314
SNORA44	1.36897	0.004	0.0146702
TMSB4X	1.3674	0.0039	0.0143876
PDCD6	1.36702	5e-05	0.000370102
GPATCH4	1.36664	5e-05	0.000370102
HDAC3	1.36427	5e-05	0.000370102
RPS2P32	1.36186	5e-05	0.000370102
NKAP	1.36132	5e-05	0.000370102
HIST1H2AI	1.36048	5e-05	0.000370102
LOC100652999	1.35899	5e-05	0.000370102
SCPEP1	1.35803	5e-05	0.000370102
HIST1H3H	1.35737	5e-05	0.000370102
PMVK	1.35431	5e-05	0.000370102
C11orf71	1.3539	5e-05	0.000370102
SDF2L1	1.35059	5e-05	0.000370102
PLTP	1.34825	0.0013	0.00587193
LOC100130938	1.34789	0.00155	0.00680283
EMP3	1.34254	5e-05	0.000370102
TMEM18	1.33936	5e-05	0.000370102
C20orf196	1.3373	5e-05	0.000370102
WASH1	1.33663	5e-05	0.000370102
RPS21	1.33537	5e-05	0.000370102
CBR1	1.33497	5e-05	0.000370102
NEU1	1.33486	5e-05	0.000370102
LOC100134868	1.3339	5e-05	0.000370102
TSNARE1	1.33212	5e-05	0.000370102
AARS	1.33134	5e-05	0.000370102
GGCT	1.3312	5e-05	0.000370102
LOC100652920	1.33106	5e-05	0.000370102
MS4A4E	1.32912	5e-05	0.000370102
RNF217	1.32876	5e-05	0.000370102
GPS2	1.32807	5e-05	0.000370102
MGC72080	1.32715	5e-05	0.000370102
SPHK1	1.32579	5e-05	0.000370102
ZBTB25	1.3257	5e-05	0.000370102
SCARNA16	1.32387	5e-05	0.000370102
ARL6IP4	1.32378	5e-05	0.000370102
C6orf108	1.32257	5e-05	0.000370102
MEA1	1.32087	5e-05	0.000370102
C16orf61	1.318	5e-05	0.000370102
C20orf134	1.31787	0.0089	0.0276795
MRPL51	1.31758	5e-05	0.000370102
FXYD6	1.31679	5e-05	0.000370102
LOC100507474	1.3146	0.0133	0.0383376
LOC100507071	1.31144	0.0013	0.00587193
LOC100507375	1.31045	0.0005	0.00266422
SCARNA1	1.30874	0.00135	0.00606006
PHF5A	1.30842	5e-05	0.000370102
FCER1A	1.30817	5e-05	0.000370102
PSMD6	1.30684	5e-05	0.000370102
RPLP1	1.30653	5e-05	0.000370102
RPS2	1.30496	5e-05	0.000370102
SQRDL	1.3016	5e-05	0.000370102
RAN	1.30129	5e-05	0.000370102
HIST1H4K	1.29994	5e-05	0.000370102
IFT46	1.29976	5e-05	0.000370102
CCT3	1.29972	5e-05	0.000370102
RPL36AL	1.29939	5e-05	0.000370102
LOC100134229	1.29842	5e-05	0.000370102
DDX39A	1.29675	5e-05	0.000370102
PTTG1	1.29462	5e-05	0.000370102
RPL35	1.29384	5e-05	0.000370102
LINC00324	1.29076	5e-05	0.000370102
TNFRSF17	1.29036	5e-05	0.000370102
C19orf60	1.2902	5e-05	0.000370102
CAMTA1	1.28916	5e-05	0.000370102
S100A12	1.28806	5e-05	0.000370102
GPN3	1.28768	5e-05	0.000370102
C7orf36	1.28749	5e-05	0.000370102
NANS	1.28702	0.001	0.00472422
C17orf90	1.28521	5e-05	0.000370102
SNORA54	1.2843	5e-05	0.000370102
LOC100506057	1.28214	0.0001	0.000684367
TXN	1.28095	5e-05	0.000370102
C6orf48	1.27792	5e-05	0.000370102
HTRA4	1.27776	5e-05	0.000370102
GMPPB	1.27675	5e-05	0.000370102
STRA13	1.27591	5e-05	0.000370102
MRPS33	1.27301	5e-05	0.000370102
HNRNPM	1.27278	5e-05	0.000370102
RPL8	1.26989	5e-05	0.000370102
RPF2	1.26766	5e-05	0.000370102
RPL26L1	1.26743	5e-05	0.000370102
LOC284440	1.26622	5e-05	0.000370102
HIST1H4I	1.26509	0.00335	0.0126566
LOC339902	1.26451	5e-05	0.000370102
UCN	1.26444	0.015	0.042292
HIST1H3J	1.26373	5e-05	0.000370102
LOC100132707	1.26297	5e-05	0.000370102
IMMP1L	1.26262	0.0013	0.00587193
LOC100507025	1.26023	0.0002	0.00123235
HIST1H2AG	1.25908	5e-05	0.000370102
NBPF14	1.25898	5e-05	0.000370102
HINT2	1.25631	5e-05	0.000370102
TUFM	1.25573	5e-05	0.000370102
TADA2A	1.25522	5e-05	0.000370102
EXOSC9	1.255	5e-05	0.000370102
LOC100507013	1.25418	0.0026	0.0103266
CCT4	1.2527	5e-05	0.000370102
RASSF8	1.25141	5e-05	0.000370102
IFI27L2	1.24659	5e-05	0.000370102
LOC100507306	1.24566	5e-05	0.000370102
LOC100652944	1.2437	5e-05	0.000370102
MST1	1.24262	5e-05	0.000370102
MVD	1.24105	5e-05	0.000370102
IMPDH1	1.24078	5e-05	0.000370102
STUB1	1.23975	5e-05	0.000370102
TFIP11	1.23892	5e-05	0.000370102
IRF2	1.23759	5e-05	0.000370102
PRMT1	1.23558	5e-05	0.000370102
NRF1	1.23503	5e-05	0.000370102
LOC389607	1.2345	0.0003	0.00173314
LOC100507377	1.23258	0.00025	0.00149761
PIN4	1.23174	5e-05	0.000370102
VPS29	1.22992	5e-05	0.000370102
SNORA61	1.22758	5e-05	0.000370102
NUDCD2	1.22681	5e-05	0.000370102
SNORD116-15	1.22655	0.00475	0.0168214
NDUFB1	1.22652	5e-05	0.000370102
C1orf216	1.22641	5e-05	0.000370102
MARCH8	1.22298	5e-05	0.000370102
RUVBL1	1.22073	5e-05	0.000370102
SNAPC5	1.2202	0.001	0.00472422
BREA2	1.21796	5e-05	0.000370102
CLEC12B	1.21788	5e-05	0.000370102
HNRNPA1L2	1.21646	5e-05	0.000370102
C14orf80	1.21283	5e-05	0.000370102
SUOX	1.21143	5e-05	0.000370102
NUDT1	1.21032	5e-05	0.000370102
GALK2	1.20989	5e-05	0.000370102
BEX2	1.20965	5e-05	0.000370102
MRPL18	1.2079	5e-05	0.000370102
MBD3	1.20789	5e-05	0.000370102
NPIPL2	1.20562	5e-05	0.000370102
EML6	1.2022	5e-05	0.000370102
C11orf80	1.20045	5e-05	0.000370102
PSMG1	1.19986	5e-05	0.000370102
AKAP8L	1.19908	5e-05	0.000370102
ERAL1	1.19908	5e-05	0.000370102
UBC	1.19879	5e-05	0.000370102
MRPL46	1.19854	5e-05	0.000370102
AMT	1.19406	5e-05	0.000370102
FIZ1	1.19341	5e-05	0.000370102
SNORD116-24	1.19304	0.00355	0.0132884
HHLA3	1.19253	5e-05	0.000370102
SNORA81	1.19175	0.00115	0.00529146
ALDH8A1	1.19028	5e-05	0.000370102
UBL7	1.18946	5e-05	0.000370102
MRPL42P5	1.18744	0.00075	0.00374051
BCAS2	1.18716	5e-05	0.000370102
GCAT	1.18708	5e-05	0.000370102
HIST1H2AC	1.18584	5e-05	0.000370102
TNNI2	1.1847	0.00015	0.000969761
NSUN5P2	1.18176	0.00055	0.00288713
IMPDH2	1.18171	5e-05	0.000370102
LOC100506032	1.18102	0.00025	0.00149761
RNMTL1	1.18061	0.0003	0.00173314
TRIP13	1.17922	5e-05	0.000370102
OSBPL10	1.1792	5e-05	0.000370102
LOC100129935	1.17909	5e-05	0.000370102
SEC61B	1.17855	5e-05	0.000370102
WIPI1	1.17842	5e-05	0.000370102
NSMCE2	1.17833	5e-05	0.000370102
SNORD94	1.17758	0.00025	0.00149761
POLR3A	1.17681	5e-05	0.000370102
MZT2A	1.17575	5e-05	0.000370102
MFSD9	1.17535	5e-05	0.000370102
NSRP1	1.17516	5e-05	0.000370102
ZNHIT1	1.17504	5e-05	0.000370102
TRAF3IP3	1.17496	5e-05	0.000370102
PSMC3IP	1.17411	0.0003	0.00173314
GAPDH	1.17349	5e-05	0.000370102
PREB	1.17069	5e-05	0.000370102
GALK1	1.17026	5e-05	0.000370102
FBXW4	1.16811	5e-05	0.000370102
LOC340515	1.16773	5e-05	0.000370102
CHMP6	1.16709	5e-05	0.000370102
LOC100287896	1.16667	0.0001	0.000684367
IL18	1.16594	5e-05	0.000370102
SERPINH1	1.16549	5e-05	0.000370102
FAM173A	1.16546	5e-05	0.000370102
RPL7	1.16533	5e-05	0.000370102
LINC00467	1.16421	0.00175	0.00749457
AGPAT2	1.16278	5e-05	0.000370102
CSTB	1.16159	5e-05	0.000370102
FABP5	1.16121	5e-05	0.000370102
GSTK1	1.1599	5e-05	0.000370102
ASGR2	1.15791	5e-05	0.000370102
ETFA	1.15613	5e-05	0.000370102
BOLA3	1.15608	5e-05	0.000370102
SNORA78	1.15599	0.0029	0.0112429
HIST1H1E	1.15577	5e-05	0.000370102
LOC100652733	1.15512	5e-05	0.000370102
METTL19	1.15379	5e-05	0.000370102
LOC100630918	1.15327	5e-05	0.000370102
LOC100132774	1.15312	0.00375	0.0139274
RBM26-AS1	1.15258	5e-05	0.000370102
LOC100652945	1.14982	0.0045	0.0161224
PRMT7	1.14967	5e-05	0.000370102
RNF31	1.14323	5e-05	0.000370102
S100A8	1.14301	5e-05	0.000370102
DTYMK	1.14235	5e-05	0.000370102
PTRH1	1.14072	0.0003	0.00173314
WDR27	1.1398	5e-05	0.000370102
PVRL3	1.13859	0.00015	0.000969761
PIN1	1.13846	5e-05	0.000370102
NEIL3	1.13612	5e-05	0.000370102
PHF10	1.1351	5e-05	0.000370102
GGH	1.13458	0.0069	0.0226066
MCCC1	1.13443	5e-05	0.000370102
BMS1P4	1.13336	5e-05	0.000370102
CCNB1	1.13319	0.00015	0.000969761
SPIN2B	1.13313	0.00035	0.00197564
LOC100289341	1.13267	5e-05	0.000370102
BATF	1.12761	5e-05	0.000370102
SHFM1	1.12759	5e-05	0.000370102
RPLP0	1.12739	5e-05	0.000370102
THG1L	1.12648	5e-05	0.000370102
LOC389634	1.12611	5e-05	0.000370102
PIGP	1.12602	5e-05	0.000370102
CCL28	1.12571	5e-05	0.000370102
KIR2DL3	1.12545	0.00085	0.00413749
PIGX	1.12499	5e-05	0.000370102
LOC100653018	1.12445	0.01745	0.0479354
NUBP1	1.1234	5e-05	0.000370102
PNOC	1.12211	5e-05	0.000370102
BUB1	1.12166	5e-05	0.000370102
LOC728755	1.12159	5e-05	0.000370102
LOC100507286	1.11975	0.0085	0.0266944
HVCN1	1.11863	5e-05	0.000370102
HIST2H3D	1.11777	5e-05	0.000370102
RNU12	1.11671	5e-05	0.000370102
NDUFAF1	1.11576	5e-05	0.000370102
TCP1	1.1157	5e-05	0.000370102
NPHP3-ACAD11	1.11546	0.0069	0.0226066
VCP	1.11494	5e-05	0.000370102
FAM156A	1.11482	5e-05	0.000370102
HIST1H2AL	1.11354	5e-05	0.000370102
GADD45A	1.11349	5e-05	0.000370102
IMMT	1.11317	5e-05	0.000370102
TXN2	1.1127	5e-05	0.000370102
PDRG1	1.11193	5e-05	0.000370102
C17orf49	1.11131	0.00055	0.00288713
TRIM3	1.11123	5e-05	0.000370102
LOC96610	1.10969	5e-05	0.000370102
BBS4	1.10958	5e-05	0.000370102
C15orf57	1.10821	5e-05	0.000370102
METTL2B	1.10638	5e-05	0.000370102
C7orf55	1.1063	5e-05	0.000370102
C6orf164	1.10617	0.00055	0.00288713
DNAJB2	1.10591	5e-05	0.000370102
AGA	1.10557	5e-05	0.000370102
PNKD	1.10496	0.009	0.0279338
HCG26	1.10487	5e-05	0.000370102
LOC642424	1.1048	0.0081	0.0256897
CCT6P1	1.1041	0.0011	0.00510741
LOC100652993	1.10198	0.003	0.0115753
RUSC2	1.1016	5e-05	0.000370102
GALT	1.10109	5e-05	0.000370102
LOC100507540	1.10058	0.004	0.0146702
C9orf37	1.10001	0.00055	0.00288713
DHRS1	1.09913	5e-05	0.000370102
MRPS17	1.09847	5e-05	0.000370102
LOC100506459	1.09758	5e-05	0.000370102
MED7	1.09758	5e-05	0.000370102
RAB1B	1.09723	5e-05	0.000370102
UBXN2A	1.09666	5e-05	0.000370102
DAPK3	1.09659	5e-05	0.000370102
HAUS8	1.09636	5e-05	0.000370102
FDX1L	1.0963	0.0002	0.00123235
RRAGA	1.09592	5e-05	0.000370102
FOLR3	1.09565	0.00035	0.00197564
RPS5	1.09178	5e-05	0.000370102
DDX11	1.09077	5e-05	0.000370102
BLVRB	1.08874	5e-05	0.000370102
SWAP70	1.08867	5e-05	0.000370102
PROCA1	1.08863	0.0005	0.00266422
CCDC159	1.08837	5e-05	0.000370102
PDIA5	1.08775	5e-05	0.000370102
BST2	1.08746	5e-05	0.000370102
LOC100132273	1.08672	5e-05	0.000370102
PHPT1	1.08489	5e-05	0.000370102
PSMB9	1.0843	5e-05	0.000370102
DIS3L	1.08415	5e-05	0.000370102
SEC11A	1.08402	5e-05	0.000370102
SFXN5	1.08324	5e-05	0.000370102
RUNDC1	1.08251	5e-05	0.000370102
EIF2B2	1.082	5e-05	0.000370102
FAHD1	1.08193	5e-05	0.000370102
UXT	1.08154	5e-05	0.000370102
PATE2	1.08133	5e-05	0.000370102
FIS1	1.08102	5e-05	0.000370102
MOSPD2	1.08069	5e-05	0.000370102
KRTCAP2	1.08024	5e-05	0.000370102
FARSA	1.07963	5e-05	0.000370102
TTC23	1.07928	5e-05	0.000370102
CDK8	1.07866	5e-05	0.000370102
CCDC88B	1.07842	5e-05	0.000370102
MARK3	1.07721	5e-05	0.000370102
AVPR2	1.07578	5e-05	0.000370102
AP2M1	1.0747	5e-05	0.000370102
SHANK2-AS3	1.07402	5e-05	0.000370102
LOC729041	1.07166	0.00875	0.0272622
NPM3	1.07125	5e-05	0.000370102
HIST1H1B	1.0696	5e-05	0.000370102
LOC100506079	1.06912	0.00255	0.0101573
OAF	1.06843	5e-05	0.000370102
CCDC30	1.06821	5e-05	0.000370102
FTL	1.06807	5e-05	0.000370102
FUZ	1.06769	0.01655	0.0458374
LOC100652818	1.06753	5e-05	0.000370102
C1orf123	1.06566	5e-05	0.000370102
RBMX2	1.06548	5e-05	0.000370102
STX8	1.06518	5e-05	0.000370102
TMED9	1.06513	5e-05	0.000370102
TRIM7	1.06511	0.00265	0.0104829
SRP14	1.06471	5e-05	0.000370102
KCTD21	1.06401	5e-05	0.000370102
DHRS7B	1.0636	5e-05	0.000370102
SUCLA2	1.06347	5e-05	0.000370102
RPS11	1.06315	5e-05	0.000370102
HSD17B8	1.06309	5e-05	0.000370102
TMEM9	1.0626	5e-05	0.000370102
UBB	1.06254	5e-05	0.000370102
CIRH1A	1.0624	5e-05	0.000370102
SUCLG1	1.06239	5e-05	0.000370102
GRWD1	1.06166	5e-05	0.000370102
LOC100506877	1.06117	0.00015	0.000969761
FXYD7	1.05961	0.0017	0.0073397
RPS7	1.05957	5e-05	0.000370102
SNORD13	1.05867	5e-05	0.000370102
VSTM1	1.05732	5e-05	0.000370102
RPS16	1.05603	5e-05	0.000370102
C4orf52	1.05478	5e-05	0.000370102
HIST1H2BE	1.05469	5e-05	0.000370102
TOMM5	1.05433	5e-05	0.000370102
HIST1H2AH	1.0539	5e-05	0.000370102
NOSIP	1.05343	5e-05	0.000370102
HSD17B1	1.05274	0.0005	0.00266422
LOC100506620	1.05202	5e-05	0.000370102
FOXP3	1.05113	0.00755	0.0242409
HOMER2	1.05045	0.0001	0.000684367
FLJ14186	1.04946	5e-05	0.000370102
ZCCHC17	1.04929	5e-05	0.000370102
LOC100506678	1.04899	0.00325	0.012343
DNAJC19	1.04883	5e-05	0.000370102
ZGPAT	1.04773	5e-05	0.000370102
NRG1	1.04727	5e-05	0.000370102
HINFP	1.04673	5e-05	0.000370102
SNX22	1.0462	0.00375	0.0139274
COPS6	1.04538	5e-05	0.000370102
LILRB2	1.04528	5e-05	0.000370102
SLC2A5	1.04435	0.00055	0.00288713
CPSF4	1.04411	0.00395	0.0145332
PARP2	1.04374	5e-05	0.000370102
WDR54	1.04356	5e-05	0.000370102
CCNB1IP1	1.04345	5e-05	0.000370102
STAC3	1.04244	5e-05	0.000370102
PSMB3	1.04224	5e-05	0.000370102
PHF7	1.04118	5e-05	0.000370102
RPP40	1.04112	0.00195	0.00817589
LDHB	1.04013	5e-05	0.000370102
ZNFX1-AS1	1.03943	0.00285	0.0111021
CLIP2	1.03904	5e-05	0.000370102
APITD1	1.03881	0.01595	0.0445244
EIF2AK3	1.0384	5e-05	0.000370102
LOC283693	1.03836	5e-05	0.000370102
ZNF114	1.03807	0.0001	0.000684367
FILIP1L	1.03791	0.00015	0.000969761
PPM1N	1.03774	0.00015	0.000969761
CENPBD1	1.03757	0.00015	0.000969761
HLA-DQA2	1.03732	5e-05	0.000370102
LOC256880	1.03609	0.00035	0.00197564
C10orf58	1.03607	5e-05	0.000370102
LOC100290566	1.03576	5e-05	0.000370102
PAAF1	1.03558	5e-05	0.000370102
TOR2A	1.03555	0.00045	0.00244023
RPL23A	1.03536	5e-05	0.000370102
SNORD17	1.03526	5e-05	0.000370102
C14orf184	1.03496	5e-05	0.000370102
PSME2	1.03457	5e-05	0.000370102
MT1F	1.03415	0.0077	0.0246708
MPZL2	1.03381	0.0003	0.00173314
LOC388789	1.03229	5e-05	0.000370102
RUSC1	1.03207	0.00395	0.0145332
ANKLE1	1.03177	5e-05	0.000370102
RPL36	1.03166	5e-05	0.000370102
SMARCAL1	1.03154	5e-05	0.000370102
C15orf24	1.03113	5e-05	0.000370102
RMI2	1.03078	0.00305	0.0117288
DHRS7	1.03072	5e-05	0.000370102
CHPT1	1.0295	5e-05	0.000370102
LOC283922	1.0291	5e-05	0.000370102
AGAP3	1.02908	5e-05	0.000370102
TRAPPC5	1.02852	5e-05	0.000370102
COX4I1	1.02735	5e-05	0.000370102
STMN3	1.02734	5e-05	0.000370102
ANXA5	1.02704	5e-05	0.000370102
RPL3	1.02689	5e-05	0.000370102
TMLHE	1.02633	5e-05	0.000370102
LOC150381	1.02613	5e-05	0.000370102
AGMAT	1.02591	0.00015	0.000969761
GSDMD	1.02588	5e-05	0.000370102
PSMG3	1.02535	5e-05	0.000370102
COX7C	1.02502	5e-05	0.000370102
C19orf10	1.02447	5e-05	0.000370102
SRRM5	1.02405	0.00695	0.0227164
ZNF221	1.02405	0.00015	0.000969761
CNR2	1.02326	5e-05	0.000370102
NXNL2	1.02281	5e-05	0.000370102
MORN3	1.02251	5e-05	0.000370102
MRPL34	1.02233	5e-05	0.000370102
CFL1P1	1.0223	0.0003	0.00173314
KCNG1	1.02216	0.0007	0.00351914
TEX9	1.0215	0.002	0.00833736
ACOT8	1.02129	5e-05	0.000370102
ATAD3C	1.02095	5e-05	0.000370102
DUSP28	1.02022	5e-05	0.000370102
ERGIC3	1.01984	5e-05	0.000370102
JUP	1.01917	5e-05	0.000370102
ANKRD36B	1.01898	5e-05	0.000370102
ASB8	1.01861	5e-05	0.000370102
NDUFA12	1.01849	5e-05	0.000370102
RNF113A	1.01823	5e-05	0.000370102
AKR1A1	1.01796	5e-05	0.000370102
YME1L1	1.01768	5e-05	0.000370102
ZNF692	1.01697	5e-05	0.000370102
ZNF319	1.01673	5e-05	0.000370102
NOP16	1.01667	5e-05	0.000370102
DYNLRB1	1.01641	5e-05	0.000370102
C3orf37	1.01571	5e-05	0.000370102
NMRAL1	1.01505	5e-05	0.000370102
HIST2H2AC	1.01392	5e-05	0.000370102
MRPL52	1.01386	5e-05	0.000370102
DCDC2B	1.01374	0.00025	0.00149761
IL32	1.01362	5e-05	0.000370102
GLI4	1.0133	5e-05	0.000370102
C9orf95	1.01175	5e-05	0.000370102
FAIM	1.01166	5e-05	0.000370102
PSMB7	1.01088	0.0009	0.00433496
LOC728622	1.01037	0.00045	0.00244023
PLA2G4A	1.01035	5e-05	0.000370102
FAM190A	1.01025	5e-05	0.000370102
TM7SF2	1.0095	5e-05	0.000370102
PLA2G4C	1.00931	0.0007	0.00351914
GMCL1	1.00929	5e-05	0.000370102
PPP2R2D	1.00827	5e-05	0.000370102
APTX	1.00816	5e-05	0.000370102
INE2	1.00808	0.0022	0.00900772
STOML1	1.00748	0.0002	0.00123235
ANKRD36	1.00747	5e-05	0.000370102
PDZD9	1.00691	0.00015	0.000969761
LOC100130458	1.00662	0.00055	0.00288713
SSNA1	1.00595	5e-05	0.000370102
MANBAL	1.00537	5e-05	0.000370102
A2MP1	1.00512	5e-05	0.000370102
CEP78	1.00306	5e-05	0.000370102
LINC00410	1.0029	5e-05	0.000370102
MRFAP1	1.00266	5e-05	0.000370102
PCCA	1.00258	5e-05	0.000370102
NOP56	1.00203	5e-05	0.000370102
CCDC72	1.00172	5e-05	0.000370102
VAMP5	1.00154	5e-05	0.000370102
SNORA40	1.00121	0.0003	0.00173314
LSG1	1.0011	5e-05	0.000370102
LOC100506071	1.00044	0.00085	0.00413749
DDX28	1.00004	5e-05	0.000370102
NOXA1	0.997648	5e-05	0.000370102
ZNF90	0.996584	0.00035	0.00197564
CLEC12A	0.996572	5e-05	0.000370102
TRIM61	0.995887	0.0027	0.010638
ZNF444	0.995387	5e-05	0.000370102
STX10	0.995252	5e-05	0.000370102
ASGR1	0.994638	5e-05	0.000370102
KIF16B	0.994516	5e-05	0.000370102
WDR83	0.994381	0.01725	0.0474521
LOC644634	0.993779	0.0093	0.0286521
NDUFB4	0.993625	5e-05	0.000370102
C7orf25	0.99269	5e-05	0.000370102
LRCH3	0.992316	5e-05	0.000370102
LOC100507427	0.991896	0.0003	0.00173314
PMF1	0.99179	5e-05	0.000370102
CAPN3	0.991674	5e-05	0.000370102
LENG1	0.991432	0.00035	0.00197564
PPIG	0.991307	5e-05	0.000370102
ZNF718	0.990953	5e-05	0.000370102
MDH1	0.99063	5e-05	0.000370102
ARHGAP11B	0.99056	0.01515	0.0426364
NIPSNAP1	0.990157	5e-05	0.000370102
WBSCR22	0.989735	5e-05	0.000370102
CTNNBL1	0.989568	5e-05	0.000370102
MFSD7	0.98947	0.00015	0.000969761
LYSMD2	0.988859	5e-05	0.000370102
RNU105A	0.988332	0.0019	0.0080003
PSMD4	0.988205	5e-05	0.000370102
KCTD5	0.988101	5e-05	0.000370102
ABHD12	0.987385	0.00135	0.00606006
PRICKLE3	0.987027	5e-05	0.000370102
LOC284804	0.986702	0.0006	0.0030954
ZNF696	0.986554	5e-05	0.000370102
PDE6D	0.985963	5e-05	0.000370102
RARRES3	0.98563	5e-05	0.000370102
CXCR5	0.984819	0.0024	0.00965179
ZMYND19	0.984359	5e-05	0.000370102
INVS	0.984043	5e-05	0.000370102
ATG7	0.982748	5e-05	0.000370102
CEP104	0.982425	5e-05	0.000370102
LOC162632	0.982302	5e-05	0.000370102
PML	0.981745	5e-05	0.000370102
ZNF593	0.981486	0.00025	0.00149761
GNL3	0.980643	5e-05	0.000370102
RPL41	0.98012	0.00015	0.000969761
OAZ1	0.979867	5e-05	0.000370102
ATPIF1	0.979553	5e-05	0.000370102
ALS2CR12	0.978794	5e-05	0.000370102
SETMAR	0.978539	5e-05	0.000370102
POLR1C	0.978463	5e-05	0.000370102
VDAC3	0.977684	5e-05	0.000370102
BCAP31	0.977489	5e-05	0.000370102
LOC254128	0.977425	0.0083	0.0261855
NAIP	0.976968	5e-05	0.000370102
TM2D3	0.976809	5e-05	0.000370102
TMEM187	0.976327	0.00255	0.0101573
SIGLEC10	0.976017	5e-05	0.000370102
SP110	0.975404	5e-05	0.000370102
TMEM14A	0.974966	0.0009	0.00433496
BTF3	0.973853	5e-05	0.000370102
URGCP	0.97354	5e-05	0.000370102
FBXL14	0.972447	5e-05	0.000370102
MLF1IP	0.972139	0.005	0.0175356
ARL16	0.971948	5e-05	0.000370102
POLD1	0.970859	5e-05	0.000370102
PGP	0.970368	5e-05	0.000370102
C12orf42	0.969846	0.0008	0.00394564
FADS3	0.969168	5e-05	0.000370102
MYH11	0.968618	0.0009	0.00433496
SNF8	0.968327	5e-05	0.000370102
USP4	0.967442	5e-05	0.000370102
UGGT2	0.967392	5e-05	0.000370102
CCDC104	0.966696	5e-05	0.000370102
ALDOC	0.966514	5e-05	0.000370102
LRRC2	0.966505	5e-05	0.000370102
CDKN2AIP	0.96645	5e-05	0.000370102
ASF1B	0.966352	0.0001	0.000684367
LOC100652765	0.965415	0.0001	0.000684367
GPN1	0.965378	0.0052	0.0180989
GLT8D1	0.964828	0.00205	0.00849189
CDK5RAP3	0.964802	5e-05	0.000370102
ANKRD19P	0.964699	0.0001	0.000684367
TRIP6	0.964631	0.0002	0.00123235
DDX24	0.962823	5e-05	0.000370102
LEO1	0.962146	5e-05	0.000370102
FCRL2	0.962068	5e-05	0.000370102
PPP4R1L	0.960994	5e-05	0.000370102
LOC100506047	0.960608	0.01455	0.041234
MRM1	0.960545	0.0001	0.000684367
LOC440993	0.958973	0.0004	0.00220905
LOC100506295	0.958852	0.00025	0.00149761
CARHSP1	0.957978	5e-05	0.000370102
RABL5	0.957945	5e-05	0.000370102
GPKOW	0.957117	5e-05	0.000370102
AKT1	0.957046	5e-05	0.000370102
IGFBP3	0.956998	0.0001	0.000684367
LOC650623	0.956955	5e-05	0.000370102
FITM2	0.956557	0.003	0.0115753
RUVBL2	0.956409	5e-05	0.000370102
HIST1H4C	0.955813	5e-05	0.000370102
HIST1H3C	0.955183	5e-05	0.000370102
EIF2B4	0.955112	5e-05	0.000370102
ITPR1	0.95443	5e-05	0.000370102
HIST1H2BK	0.954225	5e-05	0.000370102
GTPBP8	0.953183	5e-05	0.000370102
LOC100129480	0.952424	0.0007	0.00351914
STK32C	0.952075	5e-05	0.000370102
LOC642131	0.95197	5e-05	0.000370102
C15orf58	0.951957	0.00235	0.0094978
EIF3G	0.951798	5e-05	0.000370102
COMMD3-BMI1	0.95179	0.00875	0.0272622
C10orf128	0.951123	0.0022	0.00900772
HLA-DQB2	0.950888	0.00075	0.00374051
RNU4-1	0.950543	5e-05	0.000370102
NCRUPAR	0.949991	0.00055	0.00288713
CDC16	0.94998	5e-05	0.000370102
TMEM109	0.949747	5e-05	0.000370102
CEBPZ	0.949688	5e-05	0.000370102
RPL23AP7	0.948899	0.0005	0.00266422
SUV39H1	0.948646	5e-05	0.000370102
PAFAH1B3	0.948372	0.00015	0.000969761
CHMP1A	0.948363	5e-05	0.000370102
LOC100132356	0.947682	5e-05	0.000370102
SSR2	0.947636	5e-05	0.000370102
LOC100505716	0.947207	0.018	0.0490941
LPAR1	0.946592	0.00025	0.00149761
C5orf55	0.946589	0.0002	0.00123235
NDUFA1	0.946279	5e-05	0.000370102
EXOSC2	0.946218	5e-05	0.000370102
NOB1	0.94621	5e-05	0.000370102
RRAS	0.945869	5e-05	0.000370102
RPS12	0.945789	5e-05	0.000370102
ZNRF2P1	0.945537	0.0005	0.00266422
DCTPP1	0.945433	0.0001	0.000684367
GLS2	0.94445	0.0083	0.0261855
YIPF1	0.94418	5e-05	0.000370102
NAAA	0.944172	5e-05	0.000370102
MOCS2	0.944116	5e-05	0.000370102
LILRB1	0.943632	5e-05	0.000370102
OSTF1	0.943537	5e-05	0.000370102
DUS3L	0.943502	5e-05	0.000370102
METTL3	0.943275	5e-05	0.000370102
MRPL32	0.942974	5e-05	0.000370102
HSPA14	0.942683	5e-05	0.000370102
GLRX2	0.942363	0.0006	0.0030954
HIST1H4H	0.941544	5e-05	0.000370102
ATP6V1H	0.941141	5e-05	0.000370102
C9orf21	0.94112	5e-05	0.000370102
LOC728769	0.94101	5e-05	0.000370102
SGOL2	0.940816	5e-05	0.000370102
CNDP2	0.940813	5e-05	0.000370102
ICAM3	0.940697	5e-05	0.000370102
C8orf59	0.940573	5e-05	0.000370102
HIP1R	0.940218	5e-05	0.000370102
CCDC75	0.940064	5e-05	0.000370102
GPR35	0.939437	5e-05	0.000370102
RBM14-RBM4	0.938995	0.0064	0.0212819
NSUN3	0.938838	0.0001	0.000684367
PLA2G7	0.938449	0.0001	0.000684367
CCDC7	0.938071	5e-05	0.000370102
SNTN	0.938061	0.00405	0.0148221
NBEA	0.937699	5e-05	0.000370102
CRYBB2P1	0.937539	5e-05	0.000370102
TNIP3	0.937488	0.00045	0.00244023
ZNF860	0.937245	0.00235	0.0094978
VMP1	0.936347	5e-05	0.000370102
CENPQ	0.935423	0.0007	0.00351914
RAB24	0.934901	5e-05	0.000370102
ZNF667	0.934756	5e-05	0.000370102
MITD1	0.934446	5e-05	0.000370102
MX1	0.934271	5e-05	0.000370102
ERICH1	0.933631	5e-05	0.000370102
LTB	0.932787	5e-05	0.000370102
MADD	0.931955	5e-05	0.000370102
LOC100505675	0.931814	0.0116	0.0342462
NDUFA3	0.931782	5e-05	0.000370102
KRI1	0.931321	5e-05	0.000370102
CDA	0.931255	0.00015	0.000969761
RHOC	0.93119	5e-05	0.000370102
ACAA1	0.931109	5e-05	0.000370102
MTIF2	0.930596	5e-05	0.000370102
RUNDC2C	0.930326	5e-05	0.000370102
ANKMY2	0.929334	5e-05	0.000370102
SPECC1L	0.929288	5e-05	0.000370102
CCBL1	0.929079	5e-05	0.000370102
NASP	0.928895	5e-05	0.000370102
RNF26	0.928845	5e-05	0.000370102
TPM4	0.928811	5e-05	0.000370102
CCDC154	0.928517	0.00085	0.00413749
C7orf59	0.9281	5e-05	0.000370102
DNAAF2	0.927999	5e-05	0.000370102
HIST3H2A	0.927158	0.00125	0.0056721
MGC21881	0.927092	5e-05	0.000370102
CRIP3	0.927087	0.01555	0.0435665
SEPHS2	0.926331	5e-05	0.000370102
HIST1H2BB	0.926244	5e-05	0.000370102
MTRNR2L4	0.925104	5e-05	0.000370102
C1orf220	0.924339	5e-05	0.000370102
TUT1	0.924129	5e-05	0.000370102
TMEM102	0.923619	5e-05	0.000370102
KIR3DL2	0.923489	0.00135	0.00606006
TMEM111	0.922669	5e-05	0.000370102
PNRC2	0.922654	5e-05	0.000370102
C1orf50	0.922426	0.0001	0.000684367
HLA-E	0.92157	5e-05	0.000370102
HLA-F	0.921458	5e-05	0.000370102
LOC100652939	0.921268	5e-05	0.000370102
CATSPER2	0.921076	0.00095	0.00452522
LOC386758	0.920833	0.00205	0.00849189
GCHFR	0.920594	5e-05	0.000370102
LRR1	0.920264	0.0001	0.000684367
EXOC3	0.920251	5e-05	0.000370102
SEMA4B	0.91963	5e-05	0.000370102
TRUB2	0.919432	5e-05	0.000370102
CAMK4	0.919203	5e-05	0.000370102
MYL10	0.918743	0.0026	0.0103266
GTPBP3	0.918711	5e-05	0.000370102
RALB	0.918659	5e-05	0.000370102
WRNIP1	0.918076	5e-05	0.000370102
RNF41	0.91795	5e-05	0.000370102
FAM207A	0.917833	0.00055	0.00288713
MORF4L1	0.917181	5e-05	0.000370102
CCDC28B	0.917121	0.01335	0.0384335
SURF1	0.916531	5e-05	0.000370102
SLC7A7	0.916287	5e-05	0.000370102
RRP1	0.914016	5e-05	0.000370102
ZNF404	0.913692	0.0065	0.0215521
DCHS1	0.913383	5e-05	0.000370102
CARKD	0.913066	5e-05	0.000370102
TIPIN	0.912893	0.0011	0.00510741
TOP2A	0.912745	5e-05	0.000370102
PITPNC1	0.912608	5e-05	0.000370102
KIAA0895L	0.912555	0.0003	0.00173314
ARRDC1	0.912323	5e-05	0.000370102
TXNDC5	0.912174	0.00615	0.0206598
LOC100499405	0.911906	5e-05	0.000370102
LOC100133207	0.911247	5e-05	0.000370102
LSM4	0.910734	5e-05	0.000370102
LRRC6	0.910591	0.0014	0.006256
PARP9	0.910329	0.00025	0.00149761
NUDT9	0.910227	5e-05	0.000370102
ZNF30	0.910133	5e-05	0.000370102
TRIM11	0.909843	5e-05	0.000370102
REL	0.909291	5e-05	0.000370102
MTCP1NB	0.90912	0.0006	0.0030954
BEX5	0.908922	0.00685	0.0224801
SLC26A1	0.908818	0.00805	0.0255723
CLTA	0.907776	5e-05	0.000370102
GZMM	0.907558	5e-05	0.000370102
GPR37L1	0.906477	5e-05	0.000370102
TIMMDC1	0.906078	5e-05	0.000370102
MRPS5	0.905924	5e-05	0.000370102
FASTK	0.905409	5e-05	0.000370102
CHP2	0.904718	5e-05	0.000370102
DNAJC17	0.904482	0.00025	0.00149761
LINC00092	0.904185	5e-05	0.000370102
LOC285972	0.9036	5e-05	0.000370102
ZNF415	0.903469	0.0004	0.00220905
C1QL3	0.903108	0.0001	0.000684367
MRPL41	0.902814	5e-05	0.000370102
UTP11L	0.902793	5e-05	0.000370102
RPL4	0.902784	5e-05	0.000370102
TMEM134	0.902739	5e-05	0.000370102
SNORA53	0.902717	5e-05	0.000370102
UQCC	0.902619	5e-05	0.000370102
LOC100506860	0.902262	5e-05	0.000370102
MPG	0.901654	5e-05	0.000370102
RPS15	0.901245	5e-05	0.000370102
RMND1	0.900908	5e-05	0.000370102
POLE2	0.900687	0.0051	0.0178229
DNAJC22	0.900658	5e-05	0.000370102
LOC653061	0.900472	5e-05	0.000370102
PRPF19	0.899794	5e-05	0.000370102
C10orf137	0.899667	5e-05	0.000370102
RPP38	0.899636	5e-05	0.000370102
DCTD	0.899426	5e-05	0.000370102
SRP19	0.899367	0.00275	0.0107826
DSTN	0.898418	5e-05	0.000370102
GTF2F2	0.898399	5e-05	0.000370102
AIM2	0.898394	5e-05	0.000370102
ARL6	0.898154	0.002	0.00833736
SLC27A3	0.897911	5e-05	0.000370102
PIGG	0.8973	0.00045	0.00244023
ATAT1	0.896897	0.00015	0.000969761
CD19	0.896797	5e-05	0.000370102
ZNF354A	0.896732	5e-05	0.000370102
USP18	0.896588	0.00215	0.00882659
ZNF330	0.89601	5e-05	0.000370102
HIST1H3I	0.895909	5e-05	0.000370102
NUTF2	0.895423	0.0007	0.00351914
CMBL	0.893715	5e-05	0.000370102
ESRRA	0.893515	0.0002	0.00123235
LOC100652740	0.893271	0.0182	0.0495221
APOL1	0.893258	5e-05	0.000370102
CRIM1	0.89308	5e-05	0.000370102
VAV2	0.892705	5e-05	0.000370102
NUP133	0.891973	5e-05	0.000370102
ACTG1	0.891792	5e-05	0.000370102
RPS3	0.891614	5e-05	0.000370102
LOC100507331	0.891413	0.00275	0.0107826
KIFC3	0.891404	0.0002	0.00123235
GYPC	0.891313	5e-05	0.000370102
CBLN3	0.891226	0.00225	0.00917702
ZDHHC24	0.891041	5e-05	0.000370102
POLR3K	0.890461	0.00025	0.00149761
NDUFS5	0.890328	5e-05	0.000370102
SNORA8	0.890027	5e-05	0.000370102
THAP11	0.889984	0.00045	0.00244023
DDAH2	0.889778	5e-05	0.000370102
LSM1	0.889662	5e-05	0.000370102
DDX54	0.889066	5e-05	0.000370102
ATP5S	0.888641	5e-05	0.000370102
FAM176B	0.888554	0.0019	0.0080003
STX12	0.888201	5e-05	0.000370102
ATF6	0.888155	5e-05	0.000370102
ACTR5	0.887938	5e-05	0.000370102
C15orf40	0.887863	0.00015	0.000969761
FNBP4	0.887366	5e-05	0.000370102
SLC27A1	0.88685	5e-05	0.000370102
RAB42	0.886577	5e-05	0.000370102
CCT6P3	0.886573	5e-05	0.000370102
BLNK	0.886424	5e-05	0.000370102
TRIM56	0.886012	5e-05	0.000370102
CDR2	0.88577	5e-05	0.000370102
LOC100126582	0.8856	0.00525	0.0182453
CLEC16A	0.885439	5e-05	0.000370102
SLC37A4	0.885145	5e-05	0.000370102
CACYBP	0.884615	5e-05	0.000370102
LOC400548	0.884464	5e-05	0.000370102
CTSZ	0.884128	5e-05	0.000370102
INTS12	0.883584	5e-05	0.000370102
PP12719	0.883528	0.00245	0.00981281
STRADA	0.882669	5e-05	0.000370102
MAGI2-AS3	0.882289	0.0067	0.0220666
UBXN1	0.88185	5e-05	0.000370102
LOC389765	0.881839	5e-05	0.000370102
TRIP4	0.881824	5e-05	0.000370102
NOL12	0.881312	5e-05	0.000370102
AIFM2	0.880669	0.00045	0.00244023
PTPN6	0.88064	5e-05	0.000370102
ATP6V1F	0.880594	5e-05	0.000370102
CD300LB	0.880033	5e-05	0.000370102
SUGT1	0.879776	5e-05	0.000370102
COMMD4	0.879706	5e-05	0.000370102
LOC100131089	0.879567	0.0036	0.0134537
OMA1	0.87956	5e-05	0.000370102
BANP	0.879415	5e-05	0.000370102
GFOD1	0.879303	5e-05	0.000370102
LOC100131679	0.879258	0.0012	0.00547584
WDR88	0.878687	0.00605	0.0203685
CCR8	0.878672	0.00545	0.0187748
ST6GALNAC4	0.878632	5e-05	0.000370102
IRAK1	0.878613	5e-05	0.000370102
TNFRSF13B	0.878116	0.0028	0.0109351
LOC285103	0.877927	0.00315	0.0120362
NCF1B	0.877829	5e-05	0.000370102
LOC100506268	0.877292	0.0148	0.0418221
SRP54	0.877189	5e-05	0.000370102
DGCR6L	0.876902	5e-05	0.000370102
LOC285740	0.876693	5e-05	0.000370102
FLJ41757	0.876589	0.0003	0.00173314
TRMT6	0.876545	5e-05	0.000370102
ATP5O	0.87611	5e-05	0.000370102
ACRC	0.875965	5e-05	0.000370102
ARFIP2	0.875921	0.00055	0.00288713
MAP2K6	0.875683	5e-05	0.000370102
SNW1	0.875507	5e-05	0.000370102
FAM195A	0.874595	0.00015	0.000969761
PMM2	0.87347	5e-05	0.000370102
TAGLN	0.873211	5e-05	0.000370102
PCDH11Y	0.872989	0.0001	0.000684367
PAX5	0.872456	5e-05	0.000370102
CDK5	0.872107	0.0002	0.00123235
STAB1	0.871665	5e-05	0.000370102
CUTA	0.8714	5e-05	0.000370102
UPP1	0.870495	5e-05	0.000370102
ZSCAN29	0.870477	5e-05	0.000370102
TRAPPC9	0.870441	5e-05	0.000370102
HIST1H3F	0.870188	0.00015	0.000969761
WASH5P	0.869774	5e-05	0.000370102
COX6B1	0.869586	5e-05	0.000370102
PPP1R3F	0.868879	5e-05	0.000370102
MTMR1	0.868228	5e-05	0.000370102
DNAJC9	0.868047	5e-05	0.000370102
LOC100506870	0.86796	0.0021	0.00865223
C12orf62	0.867895	5e-05	0.000370102
SLC25A5	0.867087	5e-05	0.000370102
HSD17B7P2	0.866888	0.0012	0.00547584
ASL	0.866406	5e-05	0.000370102
PEX6	0.866091	5e-05	0.000370102
RPL10A	0.866039	5e-05	0.000370102
HIST3H2BB	0.865608	0.0003	0.00173314
TTF1	0.865492	5e-05	0.000370102
GIMAP5	0.865466	0.00015	0.000969761
SMC6	0.864991	5e-05	0.000370102
MTMR11	0.864933	5e-05	0.000370102
BLK	0.864906	5e-05	0.000370102
SNAPC1	0.864701	5e-05	0.000370102
GSTP1	0.864311	5e-05	0.000370102
NEK8	0.864276	5e-05	0.000370102
CHCHD5	0.863893	0.0007	0.00351914
NETO2	0.863893	0.00045	0.00244023
FAM65C	0.863445	5e-05	0.000370102
WNT7B	0.863444	5e-05	0.000370102
TTC1	0.862889	5e-05	0.000370102
C6orf115	0.862727	5e-05	0.000370102
GPR172A	0.862504	5e-05	0.000370102
MSMP	0.86242	0.0101	0.030557
LYAR	0.862389	5e-05	0.000370102
LRIG2	0.862377	5e-05	0.000370102
C17orf88	0.862309	0.0094	0.028915
EGLN3	0.862008	0.00125	0.0056721
SELS	0.861858	5e-05	0.000370102
C19orf43	0.861567	5e-05	0.000370102
FEM1B	0.861508	5e-05	0.000370102
ALAS1	0.861131	5e-05	0.000370102
CENPE	0.86102	5e-05	0.000370102
STX5	0.860895	5e-05	0.000370102
USP33	0.860676	5e-05	0.000370102
BYSL	0.860338	5e-05	0.000370102
BCAS1	0.859314	5e-05	0.000370102
SLFN14	0.858878	0.0005	0.00266422
C5orf32	0.858298	0.00115	0.00529146
ZNRD1	0.85805	5e-05	0.000370102
WDR61	0.857876	5e-05	0.000370102
HMBS	0.857806	0.00175	0.00749457
SDHAP2	0.857665	5e-05	0.000370102
CIB1	0.857434	5e-05	0.000370102
NUBP2	0.856694	5e-05	0.000370102
CCDC149	0.855914	5e-05	0.000370102
STK19	0.85561	0.00115	0.00529146
EIF4A2	0.855227	0.0001	0.000684367
SCD5	0.855084	5e-05	0.000370102
USMG5	0.855006	5e-05	0.000370102
TNIP2	0.854789	5e-05	0.000370102
ZNF789	0.854451	5e-05	0.000370102
METTL13	0.854385	5e-05	0.000370102
MYL6	0.854296	5e-05	0.000370102
LILRA6	0.854226	5e-05	0.000370102
PLD1	0.85398	5e-05	0.000370102
SAMM50	0.853962	5e-05	0.000370102
ST6GALNAC3	0.853786	0.0088	0.027387
MED6	0.853665	5e-05	0.000370102
FLYWCH2	0.853496	5e-05	0.000370102
LNX1	0.852655	0.00025	0.00149761
GMPR	0.852599	0.00065	0.00331245
ZNF207	0.852585	5e-05	0.000370102
ICT1	0.852398	5e-05	0.000370102
EFHA2	0.852376	0.0004	0.00220905
PPA2	0.851875	5e-05	0.000370102
CA6	0.851843	0.00165	0.00715969
RPL13P5	0.851806	0.01725	0.0474521
BTBD1	0.851551	5e-05	0.000370102
NDUFA13	0.851375	5e-05	0.000370102
GOLIM4	0.851224	5e-05	0.000370102
PTRHD1	0.850806	0.011	0.0327624
APIP	0.850804	0.00265	0.0104829
POLR2G	0.85057	5e-05	0.000370102
ZDHHC8P1	0.850325	0.0001	0.000684367
NELL2	0.850287	5e-05	0.000370102
SF3B4	0.850098	5e-05	0.000370102
ZNF852	0.850043	0.00015	0.000969761
TMEM156	0.849944	5e-05	0.000370102
PISD	0.849783	0.00285	0.0111021
CDKN2D	0.849777	5e-05	0.000370102
CEP170	0.84898	5e-05	0.000370102
HIBADH	0.848905	5e-05	0.000370102
LOC100507535	0.848128	5e-05	0.000370102
ZNF711	0.848013	0.0002	0.00123235
HIRA	0.847153	5e-05	0.000370102
SELPLG	0.847128	5e-05	0.000370102
SIPA1	0.847119	5e-05	0.000370102
PLEKHG7	0.847116	0.00195	0.00817589
DENND2D	0.847019	5e-05	0.000370102
TREML1	0.846974	5e-05	0.000370102
DMAP1	0.846719	5e-05	0.000370102
C1orf86	0.846167	0.00535	0.0185182
LOC100289495	0.845877	0.0008	0.00394564
CXorf40B	0.845875	5e-05	0.000370102
TAF11	0.845823	5e-05	0.000370102
KCNMB1	0.845383	0.004	0.0146702
EIF4G2	0.845327	5e-05	0.000370102
RBM10	0.844792	5e-05	0.000370102
RGL1	0.844711	0.00015	0.000969761
SNORD22	0.843792	0.0011	0.00510741
ZNF496	0.843724	5e-05	0.000370102
DCTN1	0.843614	5e-05	0.000370102
PKP4	0.84347	5e-05	0.000370102
LOC100132272	0.843328	0.0029	0.0112429
HSDL2	0.843038	5e-05	0.000370102
SLC2A8	0.842407	0.00355	0.0132884
ERI2	0.842113	0.0099	0.0300575
BICD1	0.842068	0.0001	0.000684367
BUB3	0.842051	5e-05	0.000370102
KTN1	0.841648	5e-05	0.000370102
GALNS	0.841327	5e-05	0.000370102
SYNM	0.841298	0.0001	0.000684367
ATP5L	0.840995	5e-05	0.000370102
PDCD5	0.840871	5e-05	0.000370102
ACTR3B	0.840604	0.0003	0.00173314
CLPP	0.840526	5e-05	0.000370102
LOC339803	0.840014	5e-05	0.000370102
LOC100506990	0.839634	5e-05	0.000370102
HDDC2	0.839531	5e-05	0.000370102
SLC7A5P1	0.839421	0.0091	0.0281871
AKR1E2	0.839365	0.002	0.00833736
MTCH1	0.839292	5e-05	0.000370102
POLR2F	0.838646	0.00015	0.000969761
C20orf43	0.837952	5e-05	0.000370102
RSRC1	0.837599	5e-05	0.000370102
HDAC5	0.837378	5e-05	0.000370102
SLC15A2	0.837207	5e-05	0.000370102
CKAP4	0.836936	5e-05	0.000370102
KIAA1609	0.83663	5e-05	0.000370102
NEK5	0.836572	0.00015	0.000969761
CD3D	0.83628	5e-05	0.000370102
LOC100272216	0.835357	5e-05	0.000370102
CCL5	0.835324	5e-05	0.000370102
PDCD2L	0.834329	0.00345	0.0129704
GSTO1	0.834235	5e-05	0.000370102
MYPOP	0.833687	0.001	0.00472422
FLJ42627	0.833666	5e-05	0.000370102
AFG3L1P	0.833456	5e-05	0.000370102
SRSF8	0.833333	5e-05	0.000370102
DNASE1L3	0.833226	0.00525	0.0182453
MAPK3	0.833166	0.0022	0.00900772
IFT88	0.832812	5e-05	0.000370102
CDC42BPB	0.832658	5e-05	0.000370102
C12orf24	0.832646	0.00065	0.00331245
LINC00402	0.832009	5e-05	0.000370102
LSMD1	0.831805	0.00075	0.00374051
ZNF302	0.831466	5e-05	0.000370102
EPC1	0.831236	5e-05	0.000370102
LINC00471	0.831177	0.01	0.0303077
TRIT1	0.83106	5e-05	0.000370102
POLDIP2	0.831051	5e-05	0.000370102
SNX20	0.830519	5e-05	0.000370102
ACP1	0.829501	5e-05	0.000370102
LOC644656	0.829404	0.00095	0.00452522
ATP5B	0.829059	5e-05	0.000370102
EIF3A	0.828738	5e-05	0.000370102
GZMA	0.828605	5e-05	0.000370102
ZNF830	0.828326	5e-05	0.000370102
NXF1	0.827979	5e-05	0.000370102
LOC100128398	0.82773	0.0003	0.00173314
HINT1	0.827714	5e-05	0.000370102
RSAD1	0.826978	5e-05	0.000370102
PTK6	0.826947	0.00015	0.000969761
CLSTN3	0.826566	5e-05	0.000370102
ZNF101	0.826525	5e-05	0.000370102
NDC80	0.82649	0.00115	0.00529146
HEATR3	0.826193	0.00275	0.0107826
NGFRAP1	0.825771	5e-05	0.000370102
TTC12	0.825505	5e-05	0.000370102
RAB32	0.825191	5e-05	0.000370102
TP53TG1	0.824939	0.0037	0.013764
DNAJC4	0.824907	5e-05	0.000370102
ZNF213	0.82474	5e-05	0.000370102
KLRC2	0.824399	0.0003	0.00173314
EXOC6B	0.823841	5e-05	0.000370102
PXMP2	0.823808	0.01135	0.0336667
ZNF638	0.822826	5e-05	0.000370102
IARS2	0.822752	5e-05	0.000370102
PRPF18	0.822398	5e-05	0.000370102
PLEKHG6	0.822007	0.0009	0.00433496
PRKCZ	0.821762	0.0067	0.0220666
TP53BP1	0.821572	5e-05	0.000370102
NBPF24	0.821535	0.0014	0.006256
FHAD1	0.821323	0.0004	0.00220905
ATRN	0.820666	5e-05	0.000370102
GOLGA1	0.82064	5e-05	0.000370102
D2HGDH	0.820361	5e-05	0.000370102
BRCC3	0.820085	5e-05	0.000370102
APOL2	0.819812	5e-05	0.000370102
ZNF226	0.819741	0.00015	0.000969761
FAM86DP	0.819613	0.0016	0.00697345
TRAPPC4	0.819242	5e-05	0.000370102
RRAGC	0.818906	5e-05	0.000370102
CNGB1	0.818859	0.00625	0.0209193
LAP3	0.818077	5e-05	0.000370102
MS4A6A	0.817862	5e-05	0.000370102
TNFRSF13C	0.817429	5e-05	0.000370102
ZFP42	0.817053	0.0014	0.00625599
CEACAM22P	0.816797	5e-05	0.000370102
OPN3	0.816765	0.0056	0.0191623
HMBOX1	0.816266	5e-05	0.000370102
KLHL17	0.816077	5e-05	0.000370102
HMGB2	0.816036	5e-05	0.000370102
SIRT7	0.81576	5e-05	0.000370102
KIAA1191	0.815507	5e-05	0.000370102
C9orf156	0.815269	5e-05	0.000370102
DTD1	0.815241	5e-05	0.000370102
TLR10	0.81504	5e-05	0.000370102
RPL15	0.814911	5e-05	0.000370102
KCTD15	0.814436	5e-05	0.000370102
TCHP	0.814353	5e-05	0.000370102
RSF1	0.814347	5e-05	0.000370102
LOC100507616	0.814144	5e-05	0.000370102
MRPL53	0.81397	5e-05	0.000370102
COX7B	0.813538	5e-05	0.000370102
LOC100506066	0.813168	0.01395	0.0398035
ANXA9	0.812903	0.00185	0.00783523
UQCRH	0.812889	5e-05	0.000370102
TOM1	0.812637	5e-05	0.000370102
MRPS11	0.812577	0.0001	0.000684367
CASC5	0.812502	5e-05	0.000370102
FRMD3	0.812484	0.0003	0.00173314
TSSC4	0.8119	5e-05	0.000370102
MCM5	0.811895	5e-05	0.000370102
ENO2	0.811875	5e-05	0.000370102
SNORA76	0.81183	0.0007	0.00351914
CD33	0.811821	5e-05	0.000370102
FAM86C1	0.811519	0.00415	0.0151158
PRMT2	0.811432	5e-05	0.000370102
LOC100652901	0.811385	5e-05	0.000370102
DNPEP	0.811015	5e-05	0.000370102
GADD45GIP1	0.810928	5e-05	0.000370102
PIGY	0.810882	5e-05	0.000370102
ADK	0.810333	5e-05	0.000370102
AICDA	0.810327	0.00045	0.00244023
UNC50	0.809993	5e-05	0.000370102
YARS2	0.80991	5e-05	0.000370102
ARHGAP12	0.809611	5e-05	0.000370102
UTP14C	0.809543	5e-05	0.000370102
NIPAL3	0.809513	5e-05	0.000370102
RGS20	0.809497	0.00925	0.0285555
CHMP4A	0.808872	5e-05	0.000370102
MGC12916	0.808691	0.0011	0.00510741
TNFSF14	0.808509	5e-05	0.000370102
LOC100132526	0.808237	0.0005	0.00266422
NARF	0.807793	5e-05	0.000370102
PRPF38A	0.807592	5e-05	0.000370102
IL15RA	0.807331	0.00065	0.00331245
PEX1	0.806874	5e-05	0.000370102
HS6ST1	0.80625	5e-05	0.000370102
VPS45	0.806174	5e-05	0.000370102
NPM1	0.806069	5e-05	0.000370102
C11orf31	0.805736	0.00615	0.0206598
PINX1	0.805729	0.00045	0.00244023
LYPLA2	0.805409	5e-05	0.000370102
L3MBTL3	0.805116	5e-05	0.000370102
TTC7A	0.805015	5e-05	0.000370102
IFI35	0.804202	5e-05	0.000370102
CIR1	0.804131	5e-05	0.000370102
CD58	0.804079	5e-05	0.000370102
IFT43	0.804063	0.0078	0.0249564
LOC100507094	0.803669	5e-05	0.000370102
MZT2B	0.803627	0.0002	0.00123235
HCFC1R1	0.803553	0.01535	0.0431025
DLST	0.803063	5e-05	0.000370102
GIMAP6	0.802994	5e-05	0.000370102
C15orf44	0.802885	5e-05	0.000370102
SLC37A2	0.802675	5e-05	0.000370102
SFSWAP	0.802554	5e-05	0.000370102
CORO1C	0.802349	5e-05	0.000370102
CHMP5	0.802055	5e-05	0.000370102
FLOT2	0.80203	5e-05	0.000370102
UCHL3	0.801797	5e-05	0.000370102
DAAM1	0.801792	5e-05	0.000370102
MATL2963	0.801756	0.00065	0.00331245
CHAF1A	0.800842	5e-05	0.000370102
ANKRD64	0.800699	0.0002	0.00123235
ZNF699	0.800238	5e-05	0.000370102
FDXR	0.800152	0.00355	0.0132884
SSBP4	0.799954	5e-05	0.000370102
SPATA13	0.799464	5e-05	0.000370102
LIME1	0.799255	5e-05	0.000370102
CD3E	0.798864	5e-05	0.000370102
UBASH3A	0.798642	5e-05	0.000370102
CALB1	0.798628	0.0038	0.0140866
TIMM8B	0.798545	0.0128	0.0371682
SARNP	0.797776	5e-05	0.000370102
NLRP2	0.797712	0.0004	0.00220905
C7orf28B	0.797439	0.0012	0.00547584
SCARB1	0.797304	0.0051	0.0178229
RPL29	0.796921	5e-05	0.000370102
RBM34	0.796627	5e-05	0.000370102
WDR55	0.796239	5e-05	0.000370102
LSM3	0.796165	5e-05	0.000370102
LILRA1	0.795309	5e-05	0.000370102
GPR44	0.795277	0.00925	0.0285555
POLR2C	0.794791	5e-05	0.000370102
LOC100509100	0.794741	0.0015	0.00662132
RNF14	0.794706	5e-05	0.000370102
LILRB4	0.794646	5e-05	0.000370102
C10orf11	0.794464	0.00335	0.0126566
MARCH3	0.794067	0.0003	0.00173314
PYGM	0.793931	0.00025	0.00149761
ZNF438	0.793718	5e-05	0.000370102
IFT81	0.793533	0.0042	0.0152456
LRRCC1	0.793417	0.0001	0.000684367
DDX42	0.79324	5e-05	0.000370102
NICN1	0.793063	5e-05	0.000370102
CRIP2	0.792718	0.0002	0.00123235
CCNF	0.792342	0.0007	0.00351914
LAPTM5	0.79229	5e-05	0.000370102
LDHAL6A	0.791926	0.0037	0.013764
PSME1	0.791492	5e-05	0.000370102
CD79B	0.791263	5e-05	0.000370102
GBP1	0.791	5e-05	0.000370102
RHPN1	0.790685	0.0001	0.000684367
PSMC5	0.789698	0.0003	0.00173314
C12orf44	0.789545	0.0001	0.000684367
DNAJC8	0.788955	5e-05	0.000370102
USP39	0.787687	5e-05	0.000370102
SLC43A1	0.787222	0.0001	0.000684367
PAOX	0.787114	0.00065	0.00331245
RPUSD4	0.786849	5e-05	0.000370102
FERMT3	0.786841	5e-05	0.000370102
SLTM	0.786765	5e-05	0.000370102
C13orf27	0.786744	0.01365	0.0391013
HLA-DRB1	0.786671	5e-05	0.000370102
TUBGCP2	0.786535	0.00305	0.0117288
HIST1H2BM	0.786101	0.00045	0.00244023
AS3MT	0.785471	0.01805	0.0492013
C6orf203	0.785361	0.00065	0.00331245
PICK1	0.785307	5e-05	0.000370102
REXO2	0.784774	5e-05	0.000370102
NEK6	0.784665	5e-05	0.000370102
POLR3C	0.784566	5e-05	0.000370102
MYO1E	0.784532	5e-05	0.000370102
SLC41A3	0.784244	5e-05	0.000370102
C14orf64	0.784225	0.00045	0.00244023
MNDA	0.784186	5e-05	0.000370102
LOC100652927	0.783928	5e-05	0.000370102
COPG	0.783514	5e-05	0.000370102
C22orf28	0.783463	5e-05	0.000370102
VRK2	0.783194	5e-05	0.000370102
TNFAIP8L3	0.782914	0.00105	0.0049133
CPEB3	0.782798	5e-05	0.000370102
FCGR2B	0.78272	5e-05	0.000370102
GNA15	0.782511	5e-05	0.000370102
RGS3	0.782404	5e-05	0.000370102
LOC100506259	0.782147	0.001	0.00472422
LOC100129831	0.781785	0.0052	0.0180989
NME7	0.781707	0.0024	0.00965179
ROMO1	0.781532	0.0063	0.0210458
ODC1	0.781415	5e-05	0.000370102
GFOD2	0.781245	0.0001	0.000684367
C20orf94	0.780161	0.00045	0.00244023
POLR3GL	0.779826	5e-05	0.000370102
BOD1	0.779683	5e-05	0.000370102
CDKL1	0.779515	0.00225	0.00917702
RWDD3	0.779357	0.00325	0.012343
COPA	0.779259	5e-05	0.000370102
PUS1	0.779231	5e-05	0.000370102
GAMT	0.778959	0.0073	0.0235975
FCRL3	0.778784	5e-05	0.000370102
RPL39	0.778778	5e-05	0.000370102
RAB40C	0.778582	5e-05	0.000370102
TMCO6	0.778578	0.00095	0.00452522
SLC31A2	0.778306	5e-05	0.000370102
E2F3	0.777328	5e-05	0.000370102
RAB39B	0.776911	0.0001	0.000684367
ZNF77	0.776693	0.00175	0.00749457
C1orf131	0.776338	0.015	0.042292
KHDRBS2	0.775936	0.0029	0.0112429
SEC14L4	0.775509	0.00015	0.000969761
ADAP2	0.775321	5e-05	0.000370102
LRP2BP	0.774887	0.0053	0.0183682
CXorf65	0.77473	0.00045	0.00244023
CEP89	0.774687	0.0002	0.00123235
HSPA1A	0.774559	5e-05	0.000370102
CCDC23	0.774509	0.00755	0.0242409
LOC100507584	0.7741	0.0011	0.00510741
RDH11	0.773998	5e-05	0.000370102
ZNF619	0.773924	5e-05	0.000370102
XAF1	0.773921	5e-05	0.000370102
ARHGAP18	0.773747	5e-05	0.000370102
BTD	0.773737	0.0006	0.0030954
TMIGD2	0.773343	0.0001	0.000684367
LOC100132057	0.772412	0.00215	0.00882659
CASP1	0.772226	5e-05	0.000370102
PEX7	0.772222	0.00535	0.0185182
TIRAP	0.772213	5e-05	0.000370102
RSL1D1	0.771956	5e-05	0.000370102
HDHD2	0.771953	5e-05	0.000370102
KLC1	0.771864	5e-05	0.000370102
RPS14	0.771819	5e-05	0.000370102
HIST1H2BC	0.771394	5e-05	0.000370102
NCK1	0.771392	5e-05	0.000370102
MAGOH	0.771191	0.0031	0.0118979
CD160	0.771058	5e-05	0.000370102
GGNBP2	0.770862	5e-05	0.000370102
ING2	0.770726	0.001	0.00472422
CACNG8	0.770702	5e-05	0.000370102
RG9MTD2	0.770583	0.0009	0.00433496
RASSF6	0.770454	0.0027	0.010638
SIGLEC7	0.770363	0.0004	0.00220905
ELAC2	0.77033	5e-05	0.000370102
BTBD8	0.770275	0.01615	0.0450189
PVT1	0.769955	5e-05	0.000370102
OSBPL1A	0.769928	0.00025	0.00149761
KCNN2	0.769891	0.0049	0.0172772
UBE2E1	0.769594	5e-05	0.000370102
SNRPC	0.769516	5e-05	0.000370102
THYN1	0.76898	5e-05	0.000370102
GOLGA7B	0.76892	0.0002	0.00123235
PYCARD	0.768903	5e-05	0.000370102
LILRB3	0.768537	5e-05	0.000370102
CCDC132	0.768393	5e-05	0.000370102
C12orf41	0.768278	5e-05	0.000370102
ABCF1	0.767535	5e-05	0.000370102
FBXO18	0.767249	5e-05	0.000370102
THAP8	0.767032	0.01335	0.0384335
KBTBD11	0.766477	5e-05	0.000370102
NDUFS1	0.766356	5e-05	0.000370102
ADAT1	0.765802	5e-05	0.000370102
OAS1	0.765701	5e-05	0.000370102
SNHG13	0.765084	5e-05	0.000370102
MRPS21	0.764991	5e-05	0.000370102
COX5B	0.764659	5e-05	0.000370102
MVP	0.764317	5e-05	0.000370102
MTERF	0.764219	5e-05	0.000370102
DEAF1	0.764217	0.0005	0.00266422
PEF1	0.764044	5e-05	0.000370102
KIAA1107	0.762995	5e-05	0.000370102
DMPK	0.762256	5e-05	0.000370102
LOC100288432	0.762245	0.00185	0.00783523
BLVRA	0.762229	0.0001	0.000684367
TRIP10	0.762123	0.0033	0.0125088
PFDN5	0.761925	5e-05	0.000370102
AP4S1	0.761887	0.0166	0.0459574
AVEN	0.761839	0.00305	0.0117288
PDGFB	0.761717	0.00555	0.0190242
DSG3	0.761311	5e-05	0.000370102
SLBP	0.760694	5e-05	0.000370102
DCAF8	0.760212	5e-05	0.000370102
LOC100506036	0.760022	0.0003	0.00173314
RABGAP1	0.759906	5e-05	0.000370102
SHMT2	0.759658	5e-05	0.000370102
HSP90B1	0.759135	5e-05	0.000370102
ZNF276	0.759092	5e-05	0.000370102
TBC1D10A	0.758169	5e-05	0.000370102
ALG1L	0.757915	0.00755	0.0242409
SYNGAP1	0.757906	5e-05	0.000370102
SPCS1	0.757815	0.00395	0.0145332
RPL21P44	0.757702	0.0002	0.00123235
PCSK7	0.757516	5e-05	0.000370102
PROM2	0.757486	0.0002	0.00123235
ANKRD54	0.757096	0.00045	0.00244023
KCNMB3	0.757029	0.0004	0.00220905
LGALS8	0.756815	0.00105	0.0049133
LOC154092	0.75681	0.0041	0.0149693
JMJD8	0.756739	5e-05	0.000370102
TMEM128	0.756578	5e-05	0.000370102
KATNA1	0.756429	5e-05	0.000370102
EDC4	0.756051	5e-05	0.000370102
ANKRD62P1-PARP4P3	0.756013	0.00265	0.0104829
LARP7	0.75589	5e-05	0.000370102
ZC3H15	0.755824	5e-05	0.000370102
OCIAD1	0.755668	5e-05	0.000370102
COX7A2	0.755585	5e-05	0.000370102
CCR4	0.755484	5e-05	0.000370102
ATF4	0.754911	5e-05	0.000370102
BHMT2	0.75474	5e-05	0.000370102
AMPD3	0.754597	5e-05	0.000370102
FEZ2	0.754492	5e-05	0.000370102
RXFP4	0.754296	0.0001	0.000684367
NDUFB5	0.753748	5e-05	0.000370102
MANF	0.752877	5e-05	0.000370102
C11orf30	0.752416	5e-05	0.000370102
MZB1	0.751903	0.00085	0.00413749
PON2	0.751677	0.00085	0.00413749
RAPGEF6	0.751559	5e-05	0.000370102
PLEKHG1	0.751529	5e-05	0.000370102
LOC100506499	0.7511	5e-05	0.000370102
RPL11	0.750818	5e-05	0.000370102
TSTD1	0.75071	0.00015	0.000969761
LOC100289230	0.750429	5e-05	0.000370102
BCL11A	0.750146	5e-05	0.000370102
ZNF544	0.750134	5e-05	0.000370102
SRPRB	0.750106	5e-05	0.000370102
EPPK1	0.750061	5e-05	0.000370102
MAP4	0.749917	5e-05	0.000370102
COPS5	0.749769	5e-05	0.000370102
UTP14A	0.749325	5e-05	0.000370102
ZNF124	0.748939	5e-05	0.000370102
RANGRF	0.748936	0.00075	0.00374051
UQCRC2	0.748902	5e-05	0.000370102
RARS2	0.748845	5e-05	0.000370102
CEP70	0.748183	5e-05	0.000370102
FAM76A	0.748175	5e-05	0.000370102
PGM5P2	0.747948	5e-05	0.000370102
PP7080	0.747828	5e-05	0.000370102
EPB41L4A-AS1	0.747823	5e-05	0.000370102
LCP2	0.747768	5e-05	0.000370102
COMT	0.747756	5e-05	0.000370102
FAM127B	0.747694	0.01155	0.0341424
MGST1	0.74765	0.005	0.0175356
LOC286467	0.747587	0.00175	0.00749457
KAT8	0.747518	5e-05	0.000370102
CLU	0.747475	5e-05	0.000370102
GOLGA2P5	0.747309	5e-05	0.000370102
COMMD7	0.746681	5e-05	0.000370102
CASP4	0.746592	5e-05	0.000370102
PYCRL	0.745861	5e-05	0.000370102
DKFZP586I1420	0.745532	5e-05	0.000370102
SORT1	0.74549	5e-05	0.000370102
FAM82B	0.745476	5e-05	0.000370102
NAPB	0.745453	5e-05	0.000370102
TAF15	0.745445	5e-05	0.000370102
TINF2	0.745402	5e-05	0.000370102
GLRX3	0.745355	5e-05	0.000370102
SMTNL1	0.744896	0.00685	0.0224801
HPSE	0.74455	5e-05	0.000370102
TAPT1	0.744422	5e-05	0.000370102
RALA	0.744008	5e-05	0.000370102
BBS12	0.743326	0.00425	0.0153704
SP140	0.742879	5e-05	0.000370102
CD72	0.742709	0.002	0.00833736
LINC00327	0.742507	0.00135	0.00606006
PSMC6	0.742489	5e-05	0.000370102
C11orf68	0.742036	5e-05	0.000370102
C6orf130	0.741961	5e-05	0.000370102
SCAMP2	0.741883	5e-05	0.000370102
CCDC148	0.74123	0.00735	0.0237424
SRRM2	0.741101	5e-05	0.000370102
LIX1	0.74107	0.00045	0.00244023
STXBP4	0.740705	5e-05	0.000370102
AAGAB	0.74048	5e-05	0.000370102
HIST1H2BI	0.740344	5e-05	0.000370102
FAM98B	0.740054	0.00045	0.00244023
EXOSC10	0.740028	5e-05	0.000370102
RRP8	0.739931	5e-05	0.000370102
ABCC4	0.739864	0.0001	0.000684367
ZNF233	0.739669	0.0059	0.019961
C9orf93	0.73913	0.0039	0.0143876
TSSC1	0.73872	5e-05	0.000370102
LOC100506325	0.738557	0.00115	0.00529146
PIGC	0.73842	5e-05	0.000370102
TEC	0.738285	5e-05	0.000370102
RAD51AP1	0.738254	0.0102	0.030792
RNF34	0.738204	5e-05	0.000370102
DAXX	0.738015	5e-05	0.000370102
SPECC1	0.737838	5e-05	0.000370102
NIPAL2	0.73751	0.00105	0.0049133
PARM1	0.737343	0.0006	0.0030954
ZNF816	0.737341	0.00095	0.00452522
HSD17B7	0.736976	0.00085	0.00413749
MIAT	0.736305	5e-05	0.000370102
LOC100506051	0.736143	0.0032	0.0121833
ADCK4	0.73549	5e-05	0.000370102
MFSD5	0.735376	5e-05	0.000370102
MGC16275	0.735251	0.0006	0.0030954
LOC100287314	0.734926	0.0002	0.00123235
PRICKLE1	0.734828	0.00085	0.00413749
SLC27A4	0.734753	0.0001	0.000684367
SLC35A4	0.734594	5e-05	0.000370102
SLC39A3	0.734429	0.0004	0.00220905
SASH1	0.734351	5e-05	0.000370102
NHP2	0.734057	5e-05	0.000370102
LOC100505528	0.73402	0.0126	0.0366802
SUSD1	0.733978	5e-05	0.000370102
FBXL13	0.733784	5e-05	0.000370102
NQO2	0.733782	5e-05	0.000370102
SIGLEC6	0.733734	0.00585	0.0198405
STAG3L3	0.733423	0.0028	0.0109351
MAPK8	0.733331	5e-05	0.000370102
CCDC82	0.732986	5e-05	0.000370102
COBLL1	0.732907	5e-05	0.000370102
TRIM16L	0.732463	0.0122	0.0357573
CYP2R1	0.732286	0.0003	0.00173314
FAM165B	0.732278	0.0006	0.0030954
EXOSC7	0.732213	5e-05	0.000370102
LOC100507228	0.731755	0.00555	0.0190242
LOC100505648	0.731471	0.0001	0.000684367
METTL2A	0.731461	5e-05	0.000370102
HOOK2	0.731323	0.00145	0.00644393
ISCA2	0.731303	5e-05	0.000370102
PARP3	0.731095	0.0003	0.00173314
CHST6	0.731056	5e-05	0.000370102
ADCK1	0.73103	0.00295	0.0114047
CMAS	0.730977	0.0001	0.000684367
ANKK1	0.730902	0.00935	0.028774
ITGB3BP	0.730733	0.00025	0.00149761
IFLTD1	0.730521	0.01005	0.0304258
NBPF1	0.730213	5e-05	0.000370102
SF3A3	0.730182	5e-05	0.000370102
TYSND1	0.729978	5e-05	0.000370102
LOC100506705	0.729894	0.00025	0.00149761
C11orf73	0.72979	0.00015	0.000969761
C20orf108	0.729681	5e-05	0.000370102
NDUFAF2	0.729586	0.00235	0.0094978
ZNF223	0.729447	0.00395	0.0145332
NDUFAB1	0.729103	0.0001	0.000684367
CNPPD1	0.728764	5e-05	0.000370102
CCDC144B	0.728612	5e-05	0.000370102
RNF170	0.728537	5e-05	0.000370102
ZWINT	0.728346	0.0103	0.0310531
P2RX7	0.728299	5e-05	0.000370102
LACTB	0.728104	5e-05	0.000370102
LONP1	0.727735	5e-05	0.000370102
ZNF597	0.727052	0.00155	0.00680283
EPHA10	0.726514	0.00035	0.00197564
ANK3	0.726508	5e-05	0.000370102
CXorf40A	0.726506	0.0004	0.00220905
FAM58A	0.726417	0.0002	0.00123235
PAQR3	0.726208	5e-05	0.000370102
FDPSL2A	0.725776	0.0005	0.00266422
SLC2A6	0.72577	5e-05	0.000370102
HNRNPH1	0.7248	5e-05	0.000370102
C8orf80	0.724572	5e-05	0.000370102
ZNF28	0.72324	5e-05	0.000370102
TMEM45B	0.723133	0.00025	0.00149761
PEX11G	0.72305	0.00235	0.0094978
TSG1	0.722981	5e-05	0.000370102
FBXO38	0.722925	5e-05	0.000370102
LOC100509263	0.722826	0.0001	0.000684367
RAP1B	0.722533	5e-05	0.000370102
LAS1L	0.722377	0.0001	0.000684367
CHTF8	0.722303	5e-05	0.000370102
ZNF592	0.722155	5e-05	0.000370102
RNASEH2A	0.722126	0.0027	0.010638
OTUD6A	0.721768	0.01105	0.0329042
SH3BP5	0.721557	5e-05	0.000370102
SEC1	0.721449	0.0165	0.0457081
CIITA	0.721412	5e-05	0.000370102
LOC100233209	0.721393	5e-05	0.000370102
FER	0.721385	5e-05	0.000370102
PSMB5	0.720925	0.0003	0.00173314
INF2	0.720774	5e-05	0.000370102
WDR92	0.720604	5e-05	0.000370102
SART1	0.720494	5e-05	0.000370102
PPIL4	0.720492	5e-05	0.000370102
TOR1B	0.72007	5e-05	0.000370102
PTS	0.720066	0.00205	0.00849189
CA2	0.720026	5e-05	0.000370102
DNTTIP1	0.719947	0.00015	0.000969761
GABPB2	0.719804	5e-05	0.000370102
LOC100130231	0.719622	0.00795	0.0253188
RPS26	0.719598	5e-05	0.000370102
BLOC1S3	0.719285	5e-05	0.000370102
LOC100128342	0.718895	0.0004	0.00220905
SPTSSA	0.718614	5e-05	0.000370102
WDR70	0.718374	5e-05	0.000370102
ZNF23	0.717989	5e-05	0.000370102
MAT2A	0.717887	5e-05	0.000370102
PCCB	0.717886	5e-05	0.000370102
IL23R	0.717644	0.00275	0.0107826
CXCR7	0.717635	0.0044	0.0158299
PCGF1	0.717436	0.0037	0.013764
MS4A14	0.717328	5e-05	0.000370102
POLD3	0.717224	5e-05	0.000370102
LOC284412	0.716899	0.0086	0.0269471
MT2A	0.716865	0.00085	0.00413749
ETAA1	0.716601	5e-05	0.000370102
LOC100506855	0.71615	0.0035	0.0131369
ZNF75A	0.716086	5e-05	0.000370102
MLANA	0.715976	5e-05	0.000370102
HERPUD1	0.715774	5e-05	0.000370102
FANCC	0.715609	0.0011	0.00510741
PKIG	0.715505	0.0003	0.00173314
ADRM1	0.715484	5e-05	0.000370102
LOC643837	0.715449	0.0071	0.0231081
ZKSCAN5	0.715091	5e-05	0.000370102
RFWD3	0.714628	5e-05	0.000370102
CACNB2	0.71459	0.0001	0.000684367
LOC100652950	0.714542	0.00475	0.0168214
URM1	0.714476	5e-05	0.000370102
TFB2M	0.714397	0.00015	0.000969761
PSAT1	0.714192	0.01145	0.0338832
RNASEH1	0.714121	5e-05	0.000370102
PPIP5K1	0.714099	5e-05	0.000370102
MAPKAPK5	0.713986	0.00025	0.00149761
MRPL20	0.713595	0.0003	0.00173314
PSMD11	0.713451	5e-05	0.000370102
ZRANB3	0.713209	0.00175	0.00749457
RDX	0.713093	5e-05	0.000370102
ITGAE	0.712369	0.00095	0.00452522
CD300LG	0.712298	0.0003	0.00173314
FCN1	0.71227	0.00025	0.00149761
MAML2	0.712218	5e-05	0.000370102
FCRL6	0.712182	5e-05	0.000370102
SLC19A1	0.712128	0.0002	0.00123235
MAGEH1	0.71193	0.00015	0.000969761
LOC644961	0.711416	0.00445	0.0159764
LOC100506123	0.71119	5e-05	0.000370102
ACAT1	0.711023	5e-05	0.000370102
IKBIP	0.710522	0.001	0.00472422
THOC4	0.710203	5e-05	0.000370102
OXR1	0.709802	5e-05	0.000370102
KATNAL2	0.709785	0.002	0.00833736
PA2G4P4	0.709644	0.00415	0.0151158
TYW3	0.709425	5e-05	0.000370102
SKA2	0.709251	0.00195	0.00817589
QTRT1	0.70917	0.00035	0.00197564
TP53I3	0.708988	0.00935	0.028774
MIR4461	0.708984	0.00505	0.017675
UPF2	0.708638	5e-05	0.000370102
FBXL15	0.708565	0.0002	0.00123235
TPMT	0.708332	5e-05	0.000370102
SNX25	0.708331	0.0001	0.000684367
EXT2	0.708274	5e-05	0.000370102
SPDYE7P	0.708138	5e-05	0.000370102
ARHGEF10L	0.708079	5e-05	0.000370102
C5orf13	0.707087	0.01065	0.0319268
ARSB	0.707017	0.0002	0.00123235
RNF214	0.706751	0.00055	0.00288713
STAG3L1	0.706246	5e-05	0.000370102
LOC100652805	0.706028	0.0178	0.0486642
LPXN	0.705814	5e-05	0.000370102
TRAF5	0.705694	5e-05	0.000370102
USP47	0.705427	5e-05	0.000370102
TNFAIP8L1	0.705319	5e-05	0.000370102
TTC16	0.705156	0.0079	0.0251945
OXSM	0.705025	0.0073	0.0235975
LTA4H	0.704876	5e-05	0.000370102
BAIAP3	0.704726	0.0087	0.0271801
INPP5F	0.704612	5e-05	0.000370102
FAM195B	0.704551	0.0001	0.000684367
CLIC2	0.704449	0.00335	0.0126566
NOM1	0.704233	5e-05	0.000370102
LOC100527964	0.704121	0.0005	0.00266422
FNTA	0.703902	5e-05	0.000370102
USP44	0.703683	0.00605	0.0203685
HK3	0.703661	5e-05	0.000370102
TMPRSS3	0.703392	0.01045	0.0314435
LOC145216	0.703341	0.003	0.0115753
ZNF174	0.703301	0.001	0.00472422
SMS	0.703273	5e-05	0.000370102
SRSF2	0.703237	5e-05	0.000370102
IFI16	0.703123	5e-05	0.000370102
SCN3A	0.702952	5e-05	0.000370102
GMDS	0.702731	5e-05	0.000370102
PLK1S1	0.70254	5e-05	0.000370102
PLA2G4E	0.702029	0.0016	0.00697345
PPP4R2	0.701549	5e-05	0.000370102
ANKRD39	0.701403	0.00335	0.0126566
RB1	0.701389	0.0004	0.00220905
DPM1	0.701254	5e-05	0.000370102
COPE	0.701138	5e-05	0.000370102
C21orf67	0.70089	0.0037	0.013764
NAGK	0.700695	5e-05	0.000370102
ID3	0.70068	0.00045	0.00244023
YRDC	0.700182	0.0008	0.00394564
MTHFD2	0.699878	5e-05	0.000370102
SLC25A43	0.699661	0.00035	0.00197564
NEURL4	0.699594	5e-05	0.000370102
STXBP2	0.699251	5e-05	0.000370102
HN1L	0.69913	5e-05	0.000370102
ATP1B3	0.698837	0.00015	0.000969761
TMEM213	0.698826	0.0001	0.000684367
ITIH5	0.698609	5e-05	0.000370102
FUT1	0.69856	0.00105	0.0049133
DUSP18	0.698427	0.00015	0.000969761
DHX40	0.69821	5e-05	0.000370102
LOC728554	0.698114	0.0179	0.0488988
PYHIN1	0.697843	5e-05	0.000370102
CD22	0.697562	5e-05	0.000370102
WDR24	0.697552	0.00015	0.000969761
BOP1	0.696769	5e-05	0.000370102
FBXL12	0.696734	0.00015	0.000969761
ZNF225	0.696611	0.0009	0.00433496
CTSB	0.696584	5e-05	0.000370102
EBF1	0.696556	0.0001	0.000684367
NDUFB9	0.696555	5e-05	0.000370102
MTBP	0.69606	0.0009	0.00433496
SNORA43	0.695894	0.00165	0.00715969
HRAS	0.695811	0.002	0.00833736
LOC728888	0.695489	0.00255	0.0101573
ARHGEF18	0.695406	5e-05	0.000370102
REXO4	0.695277	5e-05	0.000370102
LOC100507131	0.695031	0.01195	0.0351066
HP09025	0.69502	5e-05	0.000370102
DST	0.695006	5e-05	0.000370102
RSPRY1	0.694947	5e-05	0.000370102
TMEM229B	0.694553	5e-05	0.000370102
SLU7	0.69432	5e-05	0.000370102
TMEM106A	0.694302	5e-05	0.000370102
SLC44A1	0.694277	5e-05	0.000370102
TBRG4	0.694077	5e-05	0.000370102
LOC648987	0.694035	0.0001	0.000684367
RAB5C	0.693994	5e-05	0.000370102
SLC25A20	0.693927	5e-05	0.000370102
PLA2G15	0.69392	0.001	0.00472422
ZNF18	0.693905	0.0001	0.000684367
RBM26	0.693867	5e-05	0.000370102
CCDC58	0.693694	0.0036	0.0134537
MAP2K1	0.693229	5e-05	0.000370102
PSMD8	0.693172	5e-05	0.000370102
COMMD10	0.693131	5e-05	0.000370102
CSTF2	0.692924	0.0003	0.00173314
SMYD2	0.692874	5e-05	0.000370102
CSF1	0.692696	0.0072	0.0233564
SUGP2	0.692599	5e-05	0.000370102
TBC1D1	0.692444	5e-05	0.000370102
DGKH	0.692389	5e-05	0.000370102
MYCBP	0.692331	0.00035	0.00197564
CCT6A	0.691924	5e-05	0.000370102
TIGD1	0.691607	5e-05	0.000370102
SDCCAG3	0.691311	5e-05	0.000370102
C8orf58	0.69122	0.00185	0.00783523
LOC285954	0.691034	0.0086	0.0269471
MUT	0.690899	0.0003	0.00173314
SEMA7A	0.690798	0.0029	0.0112429
SPATA7	0.690195	0.00945	0.0290364
FAM82A1	0.690107	0.0021	0.00865223
RPL32	0.690075	5e-05	0.000370102
FBXO25	0.689807	5e-05	0.000370102
SLC35B2	0.68979	5e-05	0.000370102
SREBF1	0.689767	0.0003	0.00173314
EPC2	0.689707	5e-05	0.000370102
REV1	0.689405	5e-05	0.000370102
XPO1	0.689375	5e-05	0.000370102
HIST1H2AE	0.689248	5e-05	0.000370102
LOC100288615	0.689162	5e-05	0.000370102
ZNF662	0.689072	0.0001	0.000684367
CPSF3L	0.688983	5e-05	0.000370102
VPREB3	0.688869	0.0035	0.0131369
TARS2	0.688665	5e-05	0.000370102
PTPN18	0.688658	5e-05	0.000370102
FBXO48	0.688281	0.00235	0.0094978
SUPV3L1	0.688153	5e-05	0.000370102
DISP1	0.688	0.0014	0.006256
PRPF6	0.68785	5e-05	0.000370102
C11orf84	0.687784	0.00165	0.00715969
CRYL1	0.687315	0.00045	0.00244023
RNF220	0.687315	5e-05	0.000370102
CCDC71	0.68678	0.0001	0.000684367
RNF181	0.686705	5e-05	0.000370102
HKDC1	0.6867	0.00705	0.0229779
ACER2	0.686666	0.0033	0.0125088
SMPD2	0.686647	0.0034	0.0128069
FHL1	0.686554	0.00025	0.00149761
COX6A1	0.686416	5e-05	0.000370102
HSPA1B	0.686273	0.0107	0.0320628
SNORA7B	0.686273	0.0051	0.0178229
ILK	0.686227	5e-05	0.000370102
RBM22	0.685925	5e-05	0.000370102
KANK1	0.685917	0.00015	0.000969761
ITGA2B	0.685772	5e-05	0.000370102
NDUFV1	0.685744	5e-05	0.000370102
ATP13A1	0.685732	5e-05	0.000370102
EIF5B	0.685593	5e-05	0.000370102
DNAJC7	0.685474	0.0015	0.00662132
VILL	0.685407	5e-05	0.000370102
SLC30A9	0.685379	5e-05	0.000370102
GSS	0.685208	5e-05	0.000370102
CDK7	0.685177	0.00025	0.00149761
MAP3K9	0.68499	0.0001	0.000684367
RCSD1	0.684901	5e-05	0.000370102
ODF2L	0.684761	5e-05	0.000370102
SRSF7	0.684757	5e-05	0.000370102
ACLY	0.684642	5e-05	0.000370102
LOC100506930	0.684261	0.00035	0.00197564
FBXL18	0.684235	5e-05	0.000370102
SNHG5	0.684184	5e-05	0.000370102
FKBP2	0.684157	0.0001	0.000684367
FAM106A	0.684027	5e-05	0.000370102
PNISR	0.684015	5e-05	0.000370102
LOC100506613	0.683907	0.0009	0.00433496
ANKRD16	0.683767	0.00025	0.00149761
INPP1	0.683288	0.0052	0.0180989
NDUFA11	0.683269	0.00015	0.000969761
PABPC1	0.683209	5e-05	0.000370102
GINS4	0.683152	0.0008	0.00394564
REEP5	0.683045	5e-05	0.000370102
NOD1	0.683009	5e-05	0.000370102
PTK2	0.682995	0.0001	0.000684367
GGT7	0.68295	5e-05	0.000370102
NAP1L6	0.682362	0.00625	0.0209193
LOC728093	0.682235	5e-05	0.000370102
KIAA0889	0.682046	0.0002	0.00123235
TMEM140	0.681892	0.0008	0.00394564
RPL26	0.681692	5e-05	0.000370102
GEMIN4	0.68122	5e-05	0.000370102
ANKRD10	0.681027	5e-05	0.000370102
ICAM2	0.680994	5e-05	0.000370102
HIST1H2BO	0.680729	0.00075	0.00374051
EIF4A1	0.680483	0.0165	0.0457081
C16orf45	0.680458	0.0131	0.0379196
SLC35E3	0.680431	0.00025	0.00149761
SLC46A2	0.680372	0.00035	0.00197564
NUPL2	0.679986	5e-05	0.000370102
WDR45L	0.679501	5e-05	0.000370102
PIGH	0.6793	0.00015	0.000969761
RAB3GAP1	0.679178	5e-05	0.000370102
DBNL	0.67891	5e-05	0.000370102
CSNK2B	0.6789	5e-05	0.000370102
HBXIP	0.678897	0.0002	0.00123235
HOMER3	0.678797	0.0006	0.0030954
RNF4	0.67844	5e-05	0.000370102
TRNT1	0.678201	5e-05	0.000370102
OLA1	0.67807	5e-05	0.000370102
FAM48A	0.67783	5e-05	0.000370102
RNY4	0.677478	0.00085	0.00413749
BCAS3	0.677471	5e-05	0.000370102
MRPL42	0.677352	5e-05	0.000370102
ATP6V1E1	0.67731	5e-05	0.000370102
UTRN	0.677215	0.0001	0.000684367
TMEM130	0.677144	0.00015	0.000969761
FGFR1OP2	0.676823	5e-05	0.000370102
GCC2	0.676482	5e-05	0.000370102
E2F2	0.676462	0.0001	0.000684367
PFKP	0.676378	5e-05	0.000370102
GPX4	0.675876	5e-05	0.000370102
SNORA34	0.67582	0.0146	0.0413247
MCM4	0.675582	5e-05	0.000370102
ICOSLG	0.675543	0.00085	0.00413749
KIAA1407	0.675537	0.0001	0.000684367
PHF11	0.675369	5e-05	0.000370102
NCOA6	0.67523	5e-05	0.000370102
CLASRP	0.675155	5e-05	0.000370102
OGFR	0.675094	5e-05	0.000370102
C19orf40	0.674413	0.01645	0.0456338
THOC2	0.674226	5e-05	0.000370102
KLC4	0.674152	0.0006	0.0030954
C20orf111	0.67401	5e-05	0.000370102
WDR48	0.673624	5e-05	0.000370102
WDR5	0.673606	5e-05	0.000370102
OSGEP	0.673066	0.0001	0.000684367
NCR1	0.672806	0.0012	0.00547584
ARGLU1	0.672723	5e-05	0.000370102
LTV1	0.67249	5e-05	0.000370102
TCERG1	0.672377	5e-05	0.000370102
RNF20	0.672299	5e-05	0.000370102
MRPS22	0.672293	5e-05	0.000370102
HIST1H2BF	0.671829	5e-05	0.000370102
SNORA47	0.671697	0.00425	0.0153704
CIDEB	0.671374	0.0033	0.0125088
RPL5	0.671307	5e-05	0.000370102
COPB1	0.671256	5e-05	0.000370102
FBXO10	0.67125	0.0015	0.00662132
LOC400986	0.671158	5e-05	0.000370102
NPC2	0.671113	5e-05	0.000370102
ZNF324B	0.67096	0.0024	0.00965179
CDK14	0.670925	5e-05	0.000370102
CD300E	0.670871	5e-05	0.000370102
CD14	0.670796	5e-05	0.000370102
SNAPC3	0.670771	5e-05	0.000370102
GSDMB	0.670632	0.0001	0.000684367
MTOR	0.670604	5e-05	0.000370102
RNASEL	0.670389	5e-05	0.000370102
AFF3	0.67037	5e-05	0.000370102
EID2	0.669834	0.00075	0.00374051
YEATS4	0.669783	0.00035	0.00197564
MUC20	0.669284	0.00055	0.00288713
CXXC1	0.668831	5e-05	0.000370102
FKBP15	0.668631	5e-05	0.000370102
RRP9	0.668608	0.00115	0.00529146
UBA2	0.668396	5e-05	0.000370102
EIF4H	0.667918	5e-05	0.000370102
C5orf27	0.667621	0.0114	0.0337787
MCM3	0.667612	5e-05	0.000370102
STARD8	0.667516	0.00185	0.00783523
ENO3	0.667505	0.0095	0.0291511
PPWD1	0.667458	5e-05	0.000370102
UTP23	0.667443	5e-05	0.000370102
PSMB1	0.667331	5e-05	0.000370102
C7orf49	0.667317	0.0008	0.00394564
SIT1	0.667099	5e-05	0.000370102
CTDSP2	0.667012	5e-05	0.000370102
LRSAM1	0.666799	5e-05	0.000370102
GTF3C5	0.666721	5e-05	0.000370102
RBM23	0.666719	5e-05	0.000370102
ANP32A	0.666714	5e-05	0.000370102
TCP11L1	0.666707	0.00015	0.000969761
C15orf23	0.666234	0.00265	0.0104829
EEF1B2	0.666163	5e-05	0.000370102
TOP3B	0.66592	5e-05	0.000370102
SPICE1	0.665887	5e-05	0.000370102
CASP8AP2	0.665856	5e-05	0.000370102
THRAP3	0.665814	5e-05	0.000370102
C19orf25	0.665761	0.0019	0.0080003
PMS2L2	0.66565	0.0106	0.0318393
ELMOD1	0.665625	0.0007	0.00351914
METTL8	0.665559	0.0002	0.00123235
GEMIN6	0.665512	0.0052	0.0180989
PLAC2	0.665145	0.00245	0.00981281
KCNIP4	0.665031	0.0123	0.035951
TAF5L	0.664934	5e-05	0.000370102
MPPE1	0.664875	5e-05	0.000370102
BRDT	0.66472	0.00485	0.0171228
NDUFS8	0.664591	5e-05	0.000370102
LMBRD1	0.664025	5e-05	0.000370102
KLRF1	0.663846	5e-05	0.000370102
FAR2	0.663548	0.00315	0.0120362
[truncated: 3,084 more rows]
