# Supplementary material for: Frailty in middle age is associated with frailty status and race-specific changes to the transcriptome
Source: Aging (Albany NY). 2019 Aug 8;11(15):5518–34. doi: 10.18632/aging.102135 (PMC6710041; doi:10.18632/aging.102135)
Supplement: Supplementary Table 2 [file aging-11-102135-s006.xlsx]

## Sheet: Significant Blacks NF vs F
Supplementary Table 2. Genes significantly different between non-frail and frail blacks.
Gene Name	log2(fold change)	p value	q value
TRNW	12.8	5e-05	0.00529016
AMH	5.30867	5e-05	0.00529016
COMT	4.30052	5e-05	0.00529016
FLJ36644	3.99029	5e-05	0.00529016
IL1B	3.91095	5e-05	0.00529016
CXCL3	3.63399	0.0003	0.0225201
CCL3	3.53652	5e-05	0.00529016
RAB11FIP4	3.32303	5e-05	0.00529016
LOC100506248	3.12191	0.0004	0.0279937
CXCL2	2.86106	5e-05	0.00529016
IL8	2.76318	5e-05	0.00529016
TNF	2.63927	5e-05	0.00529016
TRAPPC4	2.60282	5e-05	0.00529016
AEBP1	2.57953	5e-05	0.00529016
GPR84	2.41009	0.00085	0.0490191
SIGLEC1	2.40456	5e-05	0.00529016
FAM154B	2.3734	5e-05	0.00529016
MTRNR2L9	2.31791	5e-05	0.00529016
UNC119B	2.17984	5e-05	0.00529016
IFI44L	2.03984	5e-05	0.00529016
IL1RN	1.99482	5e-05	0.00529016
IGJ	1.98109	5e-05	0.00529016
OR2B11	1.91038	0.00055	0.0362272
THBS1	1.87808	5e-05	0.00529016
IER3	1.87147	5e-05	0.00529016
MTRNR2L1	1.80171	5e-05	0.00529016
KLHL14	1.80159	5e-05	0.00529016
CCL4	1.79887	5e-05	0.00529016
JUP	1.78593	5e-05	0.00529016
TNFRSF17	1.65733	5e-05	0.00529016
EREG	1.65583	5e-05	0.00529016
CD83	1.61052	5e-05	0.00529016
FPR3	1.53067	5e-05	0.00529016
EGR1	1.50386	5e-05	0.00529016
NFKBIA	1.49437	0.00025	0.019306
C11orf10	1.49042	5e-05	0.00529016
MTRNR2L8	1.42709	5e-05	0.00529016
CLEC4D	1.42273	5e-05	0.00529016
LOC100289290	1.38548	0.00085	0.0490191
RNU6ATAC	1.35066	5e-05	0.00529016
NLRP2	1.34481	0.0001	0.00933125
NLRP3	1.33668	0.0001	0.00933125
ATF3	1.33087	0.0002	0.0163866
PTGS2	1.30013	5e-05	0.00529016
CES1	1.27161	5e-05	0.00529016
SNORA40	1.26912	0.00025	0.019306
IGLL1	1.26587	5e-05	0.00529016
ICAM1	1.23191	5e-05	0.00529016
SCN3A	1.22944	5e-05	0.00529016
BCAT1	1.22641	5e-05	0.00529016
PPP1R15A	1.22511	0.0001	0.00933125
MZB1	1.19901	5e-05	0.00529016
EGR2	1.18706	5e-05	0.00529016
IFIT1	1.18065	5e-05	0.00529016
CD38	1.16476	5e-05	0.00529016
GPR15	1.13326	5e-05	0.00529016
FCRL5	1.13067	5e-05	0.00529016
SMPDL3A	1.12062	0.00035	0.0256992
EGR3	1.11652	0.0002	0.0163866
SNORD13	1.09884	5e-05	0.00529016
RNU11	1.06852	5e-05	0.00529016
HIST1H3G	1.06461	0.0008	0.0465351
C9orf7	1.05941	5e-05	0.00529016
TDRD9	1.04828	0.00065	0.0408133
LOC100652818	1.04751	5e-05	0.00529016
FAM118A	1.04525	5e-05	0.00529016
IFI44	1.03913	5e-05	0.00529016
H1F0	1.02505	5e-05	0.00529016
PLAUR	1.02093	5e-05	0.00529016
BCL2A1	1.01371	5e-05	0.00529016
COBLL1	1.00847	5e-05	0.00529016
TNFAIP3	1.00001	0.0008	0.0465351
CRISPLD2	0.990255	5e-05	0.00529016
NRG1	0.980283	0.00065	0.0408133
LOC642131	0.973663	5e-05	0.00529016
CMPK2	0.973344	0.0001	0.00933125
KCNJ2	0.971918	0.0001	0.00933125
G0S2	0.967465	0.0005	0.0334254
IFIT3	0.958094	5e-05	0.00529016
LOC96610	0.956532	5e-05	0.00529016
MX1	0.947959	5e-05	0.00529016
FCRL2	0.944121	5e-05	0.00529016
S100A12	0.939625	5e-05	0.00529016
HIST1H3C	0.937047	0.0004	0.0279937
PPIF	0.924321	5e-05	0.00529016
CYorf15A	0.916962	0.0002	0.0163866
RNU4-1	0.914943	5e-05	0.00529016
RSAD2	0.900774	5e-05	0.00529016
LOC100652939	0.899023	5e-05	0.00529016
ACCS	0.893914	0.00025	0.019306
FCGR2B	0.890951	0.0002	0.0163866
SNORA8	0.882943	5e-05	0.00529016
LILRB4	0.867772	5e-05	0.00529016
LOC338758	0.866155	5e-05	0.00529016
OAS3	0.86545	5e-05	0.00529016
HLA-DQB1	0.863036	5e-05	0.00529016
NINJ1	0.853734	5e-05	0.00529016
CSTA	0.821834	5e-05	0.00529016
GM2A	0.818317	5e-05	0.00529016
CPNE5	0.816789	0.0001	0.00933125
C22orf37	0.797294	0.00055	0.0362272
RNU12	0.7953	5e-05	0.00529016
ALDH1A1	0.794242	0.00065	0.0408133
MARCKS	0.788628	5e-05	0.00529016
SGK1	0.78702	0.0002	0.0163866
FAM190A	0.78641	0.00065	0.0408133
CD163	0.775283	5e-05	0.00529016
GCNT2	0.77526	0.00015	0.013348
SOD2	0.764417	0.0003	0.0225201
KLF10	0.762527	5e-05	0.00529016
DUSP2	0.761758	0.00065	0.0408133
POU2AF1	0.755543	0.0001	0.00933125
ARL5B	0.748747	0.0001	0.00933125
FAM46C	0.747746	0.0001	0.00933125
DENND5B	0.744271	0.00015	0.013348
S100A8	0.741126	5e-05	0.00529016
CDKN1A	0.739141	0.00015	0.013348
GAB1	0.734346	0.00025	0.019306
PIM3	0.732162	5e-05	0.00529016
RIPK2	0.730173	0.00025	0.019306
PLBD1	0.724981	5e-05	0.00529016
FCRL1	0.723854	5e-05	0.00529016
PF4	0.698041	0.0002	0.0163866
LOC100288615	0.696779	5e-05	0.00529016
RNF19B	0.695723	0.0001	0.00933125
ELL2	0.690596	0.0007	0.0427541
BTG2	0.687577	0.0005	0.0334254
ITM2C	0.679242	0.00075	0.04479
PDE4B	0.678896	0.0001	0.00933125
SASH1	0.678289	0.0006	0.0387606
IRF4	0.669499	0.0001	0.00933125
BANK1	0.66877	5e-05	0.00529016
SNORD89	0.667431	0.00025	0.019306
KIAA0125	0.666547	0.0003	0.0225201
MNDA	0.663239	5e-05	0.00529016
CLIC4	0.661155	0.0001	0.00933125
TNFAIP2	0.659723	0.0007	0.0427541
FAM198B	0.653231	5e-05	0.00529016
IFIT2	0.651707	0.0007	0.0427541
GBP1	0.64122	0.0002	0.0163866
CDK14	0.639161	0.00075	0.04479
ADAM28	0.627503	0.0004	0.0279937
UBE2J1	0.619188	0.00015	0.013348
SOCS3	0.618296	0.0008	0.0465351
LTA4H	0.612703	0.00025	0.019306
TLR8	0.605122	5e-05	0.00529016
MS4A1	0.594519	0.00065	0.0408133
GAPT	0.593819	0.0005	0.0334254
TNS3	0.593558	0.0004	0.0279938
TLR7	0.593106	0.00035	0.0256992
CD1D	0.59299	0.0007	0.0427541
IL13RA1	0.591581	0.0004	0.0279937
TCF4	0.579694	0.00055	0.0362272
LAP3	0.570554	0.0006	0.0387606
RGS18	0.564259	0.0005	0.0334254
MEGF9	0.564181	0.00045	0.0311683
MX2	0.560941	0.0008	0.0465351
LDLRAP1	-0.568016	0.0002	0.0163866
GYPC	-0.604153	0.0004	0.0279937
CD6	-0.60832	5e-05	0.00529016
LOC100506776	-0.609924	0.0008	0.0465351
SAMD3	-0.610018	0.0006	0.0387606
TBX21	-0.610878	0.00045	0.0311683
ST6GALNAC6	-0.611708	0.0005	0.0334254
OBSCN	-0.619996	0.00025	0.019306
LTBP4	-0.634844	0.0004	0.0279937
GPR56	-0.654333	0.0001	0.00933125
S1PR5	-0.659167	0.00035	0.0256992
SEMA4C	-0.668405	0.00075	0.04479
TOB1	-0.668745	0.00035	0.0256992
MYBL1	-0.674297	5e-05	0.00529016
ADRB2	-0.678024	5e-05	0.00529016
IL18RAP	-0.698281	5e-05	0.00529016
TGFBR3	-0.698837	5e-05	0.00529016
PRSS23	-0.704074	0.0002	0.0163866
FMN1	-0.73187	0.0001	0.00933125
LMNA	-0.735183	0.0007	0.0427541
CYB561	-0.739966	0.0005	0.0334254
SPTB	-0.74081	0.00025	0.019306
TSPAN2	-0.751379	0.0008	0.0465351
ABCA2	-0.757881	5e-05	0.00529016
IL18R1	-0.758698	0.00025	0.019306
TARP	-0.772469	5e-05	0.00529016
PDZD4	-0.773717	5e-05	0.00529016
TSC22D3	-0.77681	5e-05	0.00529016
MATK	-0.785611	5e-05	0.00529016
NKG7	-0.802614	5e-05	0.00529016
FCRL6	-0.814413	5e-05	0.00529016
PTP4A3	-0.824327	0.00015	0.013348
RPS26	-0.824397	5e-05	0.00529016
C1orf21	-0.854381	5e-05	0.00529016
MGAM	-0.858751	5e-05	0.00529016
HLA-DRB5	-0.865895	5e-05	0.00529016
SLC25A29	-0.86641	0.0002	0.0163866
SIGLECP3	-0.887947	0.0007	0.0427541
MXRA7	-0.888059	5e-05	0.00529016
PI4KAP1	-0.898527	0.0001	0.00933125
LGR6	-0.905362	0.0004	0.0279937
TNFRSF1B	-0.906977	5e-05	0.00529016
NPDC1	-0.921454	0.0004	0.0279937
DDIT4	-0.923438	5e-05	0.00529016
PI16	-0.968255	0.0005	0.0334254
KRT73	-0.97505	0.0006	0.0387606
AGAP1	-0.975524	0.0001	0.00933125
GZMH	-1.00332	5e-05	0.00529016
CCDC163P	-1.01911	0.00075	0.04479
TNFRSF10C	-1.02003	5e-05	0.00529016
ADAMTS1	-1.04013	0.0003	0.0225201
SOX13	-1.04164	0.0003	0.0225201
HSPA7	-1.05038	5e-05	0.00529016
REXO1	-1.06241	0.0002	0.0163866
B3GAT1	-1.07893	5e-05	0.00529016
TRIM25	-1.10812	5e-05	0.00529016
RAB11FIP5	-1.13823	5e-05	0.00529016
IGFBP3	-1.14274	5e-05	0.00529016
ADAM23	-1.14315	0.0002	0.0163866
PDCD1	-1.16092	0.0002	0.0163866
GPSM1	-1.16896	0.00075	0.04479
CFH	-1.22434	5e-05	0.00529016
FCGR3B	-1.30917	5e-05	0.00529016
TPPP	-1.33513	5e-05	0.00529016
ALPL	-1.50504	0.00015	0.013348
HBA2	-1.65626	0.00015	0.013348
TMEM176B	-1.75439	5e-05	0.00529016
IL5RA	-1.86808	5e-05	0.00529016
CPSF1	-1.89159	5e-05	0.00529016
ANKRD54	-2.04173	5e-05	0.00529016
HBB	-2.05194	5e-05	0.00529016
LOC284454,MIR24-2	-2.22306	5e-05	0.00529016
UTS2	-2.42971	5e-05	0.00529016
PTBP1	-2.69976	5e-05	0.00529016
DGCR8	-3.60969	5e-05	0.00529016
SNORD3A	-4.60296	5e-05	0.00529016
