# Supplementary material for: Frailty in middle age is associated with frailty status and race-specific changes to the transcriptome
Source: Aging (Albany NY). 2019 Aug 8;11(15):5518–34. doi: 10.18632/aging.102135 (PMC6710041; doi:10.18632/aging.102135)
Supplement: Supplementary Table 3 [file aging-11-102135-s004.xlsx]

## Sheet: Significant Whites NF vs F
Supplementary Table 3. Genes significantly different between non-frail and frail whites.
Gene	log2(fold change)	p value	q value
AEBP1	5.98317	5e-05	0.00245985
AMH	5.71542	5e-05	0.00245985
ERBB2	4.24854	5e-05	0.00245985
MIR4763,MIRLET7A3,MIRLET7B,MIRLET7BHG	4.00493	5e-05	0.00245985
UNC119B	3.65355	5e-05	0.00245985
MTRNR2L9	2.18883	5e-05	0.00245985
HPS1	1.9481	5e-05	0.00245985
MTRNR2L1	1.87721	5e-05	0.00245985
FAM154B	1.77876	0.0001	0.00458503
FOLR3	1.73086	0.0003	0.0117558
TNNT1	1.64987	0.00035	0.01348
CA6	1.57742	5e-05	0.00245985
KRT72	1.44704	5e-05	0.00245985
SNORA40	1.43005	0.0002	0.00832099
DACT1	1.36058	5e-05	0.00245985
RNU6ATAC	1.31689	5e-05	0.00245985
LOC100507616	1.30876	5e-05	0.00245985
CNTNAP2	1.28962	5e-05	0.00245985
REREP3	1.27635	0.0014	0.0399831
FABP5	1.24627	0.00065	0.0221263
KRT73	1.19903	5e-05	0.00245985
FMN1	1.18708	5e-05	0.00245985
CISH	1.17063	5e-05	0.00245985
MTRNR2L8	1.14631	5e-05	0.00245985
LOC440993	1.12858	0.0012	0.0357086
NT5E	1.06864	5e-05	0.00245985
SNORA54	1.05193	0.0006	0.0208454
WHSC2	1.04318	5e-05	0.00245985
SLC16A10	1.02234	0.00135	0.0388017
HLA-DQA2	1.01559	5e-05	0.00245985
EML6	1.00706	5e-05	0.00245985
C6orf105	0.999176	5e-05	0.00245985
CPSF1	0.992687	5e-05	0.00245985
GPR15	0.973676	5e-05	0.00245985
PRICKLE1	0.954485	0.0012	0.0357086
EP400NL	0.938059	0.0002	0.00832099
LOC650623	0.930077	0.00015	0.00650161
SNORA76	0.929328	0.00115	0.0346027
RNU4-1	0.922844	5e-05	0.00245985
RNU12	0.901783	5e-05	0.00245985
PI4KAP1	0.884524	0.00055	0.0194593
NBPF9	0.879116	0.00045	0.0164837
SNORA8	0.878662	0.0001	0.00458503
NBEA	0.878446	0.00015	0.00650161
LOC162632	0.874605	0.0017	0.0459238
SLC15A2	0.844711	5e-05	0.00245985
LRRN3	0.836425	0.0001	0.00458503
C1orf152	0.829103	0.0001	0.00458503
ZNF718	0.820493	0.0013	0.0378488
TUFM	0.806042	5e-05	0.00245985
CENPK	0.805953	0.0007	0.0231843
SNORD13	0.805937	5e-05	0.00245985
OCLN	0.783572	0.00015	0.00650161
PLAG1	0.782314	0.0004	0.0149363
TCL1A	0.738497	0.0004	0.0149363
RASGRP3	0.734101	0.0003	0.0117558
PTPRO	0.728351	0.0012	0.0357086
CCDC141	0.724157	5e-05	0.00245985
FRMD4A	0.713336	0.00145	0.0407208
FCRL1	0.708813	0.00015	0.00650161
GTF2H2B	0.692932	0.00015	0.00650161
LOC100652939	0.684037	0.0007	0.0231843
ZNF594	0.678565	0.0009	0.0285459
CROCCP2	0.66771	0.0009	0.0285459
ZNF736	0.662866	0.00105	0.0320952
COL19A1	0.641193	0.0004	0.0149363
BACH2	0.634072	0.00025	0.0101201
BANK1	0.626179	0.00035	0.01348
LOC439949	0.610573	0.00065	0.0221263
RNU11	0.600592	0.0007	0.0231843
TSHZ2	0.598667	0.00145	0.0407208
BTLA	0.588512	0.0009	0.0285459
SIGIRR	-0.539808	0.0017	0.0459238
IMPDH1	-0.548524	0.00145	0.0407208
APOBR	-0.556014	0.0017	0.0459238
TBX21	-0.558306	0.0018	0.0483347
HIST2H2AC	-0.564998	0.00065	0.0221263
LIPA	-0.565464	0.0016	0.0438374
CAMKK2	-0.568426	0.0016	0.0438374
H1FX	-0.572889	0.0013	0.0378488
MAPKAPK2	-0.578235	0.00115	0.0346027
ZYX	-0.578547	0.0014	0.039983
FAM46C	-0.581099	0.0008	0.025799
MFN2	-0.58379	0.00095	0.0297814
GSN	-0.584548	0.00185	0.0492846
F2R	-0.585837	0.0013	0.0378488
C20orf3	-0.585884	0.0007	0.0231843
TNIP1	-0.590673	0.00065	0.0221263
C21orf7	-0.591272	0.00125	0.0367102
TARP	-0.592918	0.0007	0.0231843
ARID5A	-0.594893	0.0016	0.0438374
NOTCH1	-0.595797	0.0008	0.025799
PRR5L	-0.597101	0.00145	0.0407208
CD300E	-0.599644	0.001	0.0311316
DNAJB1	-0.600065	0.00105	0.0320952
NADK	-0.600068	0.00105	0.0320952
RAP1GAP2	-0.601155	0.00055	0.0194593
ITM2A	-0.604095	0.00095	0.0297814
MPP1	-0.604142	0.00105	0.0320952
LITAF	-0.608532	0.0004	0.0149363
PLEKHO2	-0.608595	0.00085	0.027281
MYO1F	-0.610406	0.0011	0.0333964
HIST1H2AG	-0.610493	0.0018	0.0483347
SH3BGRL2	-0.611986	0.0015	0.0418634
GADD45B	-0.614096	0.00105	0.0320952
AZIN1	-0.615401	0.00095	0.0297814
OSBPL5	-0.615809	0.00145	0.0407208
HIST2H2AB	-0.615963	0.00135	0.0388017
ABHD5	-0.616432	0.00125	0.0367102
LIMK2	-0.617251	0.00055	0.0194593
ERGIC1	-0.618493	0.00055	0.0194593
FCER1G	-0.620643	0.0012	0.0357086
NFKB2	-0.621743	0.00035	0.01348
EHD1	-0.622427	0.0007	0.0231843
CST3	-0.623232	0.00135	0.0388017
NAPA	-0.62393	0.00165	0.0450243
GCA	-0.625512	0.00075	0.0245985
CDK11A	-0.626328	0.0013	0.0378488
DKFZp761E198	-0.626533	0.00055	0.0194593
FCGR3A	-0.633547	0.0011	0.0333964
JUN	-0.633621	0.0016	0.0438374
RGS18	-0.63678	0.00045	0.0164837
PILRA	-0.636984	0.00155	0.0429918
VNN2	-0.638085	0.00075	0.0245985
RNF149	-0.638647	0.0003	0.0117558
ITGAX	-0.639829	0.00045	0.0164837
ABTB1	-0.640658	0.00025	0.0101201
LOC100507006	-0.644611	0.0017	0.0459238
GCH1	-0.645039	0.0008	0.025799
IL13RA1	-0.650259	0.00045	0.0164837
MAP2K3	-0.654861	0.00025	0.0101201
C1orf21	-0.655537	0.00105	0.0320952
RHOC	-0.657203	0.0004	0.0149363
RNF24	-0.65939	0.00065	0.0221263
CLTB	-0.659534	0.0018	0.0483347
RRP12	-0.659731	0.00045	0.0164837
PRIC285	-0.662948	0.0003	0.0117558
NCF1C	-0.663354	0.00145	0.0407208
PREX1	-0.664152	0.0003	0.0117558
GZMM	-0.664718	0.0009	0.0285459
TBXAS1	-0.665635	0.00025	0.0101201
ITPK1	-0.666321	0.0003	0.0117558
ITGB3	-0.666816	0.0005	0.0180697
SPATA20	-0.667545	0.00125	0.0367102
TTC38	-0.667774	0.0014	0.039983
CD8A	-0.671184	0.0002	0.00832099
PLEKHG2	-0.671389	0.00025	0.0101201
FCGR2A	-0.671798	0.0003	0.0117558
AMPD2	-0.672252	0.00015	0.00650161
CDKN2D	-0.672618	0.00065	0.0221263
SPI1	-0.673618	0.00015	0.00650161
FRAT2	-0.674067	0.0005	0.0180697
ODF3B	-0.682894	0.0011	0.0333964
JUND	-0.686771	0.00015	0.00650161
HIST1H2AK	-0.686881	0.00075	0.0245985
TECPR2	-0.689347	0.00145	0.0407208
CD8B	-0.690383	0.0006	0.0208454
EMR2	-0.692077	0.0002	0.00832099
AGTRAP	-0.692745	0.00065	0.0221263
MFAP3L	-0.693554	0.0004	0.0149363
PLEKHG3	-0.697574	0.00035	0.01348
SMAD7	-0.698351	0.00105	0.0320952
RELB	-0.698921	0.00055	0.0194593
ABCA2	-0.700226	0.00165	0.0450243
STX3	-0.700427	0.0001	0.00458503
SCAND1	-0.701543	0.00125	0.0367102
VASP	-0.701673	0.0002	0.00832099
TOM1	-0.703088	0.00015	0.00650161
CHST15	-0.703268	0.0004	0.0149363
EFHD2	-0.703516	5e-05	0.00245985
GZMB	-0.704623	0.00015	0.00650161
SNX18	-0.705508	0.0002	0.00832099
TSC22D3	-0.706005	0.00015	0.00650161
IRF1	-0.706755	0.0005	0.0180697
NRGN	-0.70724	5e-05	0.00245985
SDPR	-0.707486	0.00015	0.00650161
BHLHE40	-0.71009	5e-05	0.00245985
CST7	-0.710774	5e-05	0.00245985
EMR1	-0.715434	0.0008	0.025799
IFI44L	-0.717494	0.0007	0.0231843
COTL1	-0.719354	0.0003	0.0117558
COL18A1	-0.723038	0.0004	0.0149363
DENND3	-0.725174	5e-05	0.00245985
FTL	-0.72644	0.00185	0.0492846
PTGS1	-0.728254	5e-05	0.00245985
ADAMTSL4	-0.730111	5e-05	0.00245985
TYROBP	-0.730502	0.0002	0.00832099
C15orf39	-0.731733	0.0001	0.00458503
NFAM1	-0.731872	5e-05	0.00245985
NCF1B	-0.732841	0.0004	0.0149363
CD163	-0.733958	0.00015	0.00650161
GNAZ	-0.739268	0.0007	0.0231843
MGLL	-0.742905	0.00105	0.0320952
SIRPB1	-0.744098	0.00025	0.0101201
CTTN	-0.746074	0.0006	0.0208454
MARCH3	-0.746631	0.0002	0.00832099
SEPX1	-0.74768	0.00135	0.0388017
HIF1A	-0.750909	0.0001	0.00458503
FLT3	-0.751164	0.00135	0.0388017
SRC	-0.756943	0.00035	0.01348
RSAD2	-0.758299	0.00115	0.0346027
SLC11A1	-0.759381	5e-05	0.00245985
OTUD1	-0.759813	5e-05	0.00245985
OBFC2A	-0.764497	5e-05	0.00245985
TGFBR3	-0.765161	5e-05	0.00245985
CREB5	-0.765905	5e-05	0.00245985
PTAFR	-0.768154	5e-05	0.00245985
CCL5	-0.771942	5e-05	0.00245985
SLC16A3	-0.775253	5e-05	0.00245985
IER5	-0.775541	5e-05	0.00245985
CEBPD	-0.776525	5e-05	0.00245985
C19orf38	-0.777975	0.0002	0.00832099
SPARC	-0.782152	0.001	0.0311316
CLU	-0.783414	0.0001	0.00458503
CD300A	-0.786441	0.0001	0.00458503
PRF1	-0.788914	5e-05	0.00245985
HAL	-0.789031	0.0008	0.025799
ITGB5	-0.790787	0.00135	0.0388017
JDP2	-0.793714	0.0008	0.025799
FAM129A	-0.796288	5e-05	0.00245985
B4GALT5	-0.798627	5e-05	0.00245985
ZBTB10	-0.807437	5e-05	0.00245985
SLC2A3	-0.807785	5e-05	0.00245985
TMCC3	-0.807823	5e-05	0.00245985
IFI6	-0.808566	0.0001	0.00458503
LOC728054	-0.808642	0.00145	0.0407208
TLE3	-0.810758	5e-05	0.00245985
MAP3K8	-0.812393	5e-05	0.00245985
CXCL16	-0.815871	0.0005	0.0180697
HIST1H3H	-0.817427	5e-05	0.00245985
PTPRM	-0.824972	0.0001	0.00458503
DOCK5	-0.825277	5e-05	0.00245985
IFRD1	-0.825829	5e-05	0.00245985
GPR56	-0.82589	5e-05	0.00245985
SPTB	-0.826565	0.0001	0.00458503
CXCR4	-0.827369	0.00015	0.00650161
LILRA5	-0.833371	5e-05	0.00245985
GRINA	-0.835849	5e-05	0.00245985
FADS2	-0.836559	0.0007	0.0231843
HLA-DRB1	-0.836652	5e-05	0.00245985
RILPL2	-0.837551	5e-05	0.00245985
PDLIM7	-0.83962	0.00095	0.0297814
LOC541471	-0.844532	0.00185	0.0492846
FCAR	-0.844597	5e-05	0.00245985
ID2	-0.84551	5e-05	0.00245985
GNLY	-0.846426	5e-05	0.00245985
SPON2	-0.850538	0.0008	0.025799
PHOSPHO1	-0.854668	0.0006	0.0208454
MATK	-0.861324	5e-05	0.00245985
TCF7L2	-0.862385	5e-05	0.00245985
GNG11	-0.863832	5e-05	0.00245985
LILRB2	-0.865006	5e-05	0.00245985
LOC400499	-0.866372	0.0006	0.0208454
PALLD	-0.867468	0.00065	0.0221263
NLRP6	-0.870504	0.0005	0.0180697
DUSP5	-0.874804	5e-05	0.00245985
BTG2	-0.875173	5e-05	0.00245985
BCAT1	-0.875455	0.0001	0.00458503
ZDHHC18	-0.877412	5e-05	0.00245985
ITGA2B	-0.878434	5e-05	0.00245985
MBOAT7	-0.879354	5e-05	0.00245985
MRVI1	-0.879411	0.0004	0.0149363
FTH1	-0.882373	0.0001	0.00458503
SIGLEC1	-0.883562	0.00025	0.0101201
SECTM1	-0.884063	5e-05	0.00245985
ACRBP	-0.884304	0.0006	0.0208454
SLC43A2	-0.884992	5e-05	0.00245985
BTG3	-0.885367	0.0016	0.0438374
NID1	-0.887394	0.0001	0.00458503
GPR77	-0.888526	0.0015	0.0418634
CHST2	-0.891148	5e-05	0.00245985
IER2	-0.893021	5e-05	0.00245985
CLEC4D	-0.898942	0.0001	0.00458503
MAFF	-0.908246	0.0001	0.00458503
ARMC5	-0.912491	0.0003	0.0117558
FOSL2	-0.915084	5e-05	0.00245985
C3AR1	-0.923029	5e-05	0.00245985
ATG2A	-0.923674	5e-05	0.00245985
IL1R1	-0.925829	0.00155	0.0429918
SIGLEC5	-0.9279	0.0015	0.0418634
EGF	-0.928335	0.00055	0.0194593
SRGN	-0.939868	5e-05	0.00245985
CDKN1C	-0.940197	0.00045	0.0164837
MIDN	-0.941438	5e-05	0.00245985
FAM20C	-0.942118	0.00155	0.0429918
PROS1	-0.942487	0.0009	0.0285459
PTGER4	-0.94597	5e-05	0.00245985
DYSF	-0.946338	5e-05	0.00245985
SIRPA	-0.949646	5e-05	0.00245985
KIFC3	-0.951003	0.0017	0.0459238
SIPA1L2	-0.952432	5e-05	0.00245985
EMR3	-0.95765	5e-05	0.00245985
HLA-DRB5	-0.959842	5e-05	0.00245985
SLC15A3	-0.959952	5e-05	0.00245985
SLC7A5	-0.961018	0.00025	0.0101201
B3GNT8	-0.973506	0.00125	0.0367102
SERPINA1	-0.975406	5e-05	0.00245985
MZT2A	-0.977289	5e-05	0.00245985
HLA-L	-0.977625	5e-05	0.00245985
CD69	-0.984031	5e-05	0.00245985
FCRL6	-0.985412	5e-05	0.00245985
PTBP1	-0.989988	0.0001	0.00458503
CSF2RB	-0.99525	5e-05	0.00245985
CRISPLD2	-0.998223	5e-05	0.00245985
MYL9	-1.00492	5e-05	0.00245985
GABARAPL1	-1.00564	5e-05	0.00245985
NKG7	-1.00987	5e-05	0.00245985
GP9	-1.01389	0.00015	0.00650161
STX11	-1.01426	5e-05	0.00245985
FGFBP2	-1.01472	5e-05	0.00245985
NFKBIE	-1.01608	5e-05	0.00245985
GLUL	-1.0165	5e-05	0.00245985
CYP27A1	-1.0181	5e-05	0.00245985
SRXN1	-1.02319	5e-05	0.00245985
DOCK4	-1.02848	0.00015	0.00650161
PDZD4	-1.03092	5e-05	0.00245985
GLT1D1	-1.03733	5e-05	0.00245985
RGS2	-1.03886	5e-05	0.00245985
APOBEC3A	-1.04005	5e-05	0.00245985
BCL6	-1.04337	5e-05	0.00245985
TP53INP2	-1.04698	5e-05	0.00245985
S1PR5	-1.04889	5e-05	0.00245985
PELI1	-1.04927	5e-05	0.00245985
SOCS3	-1.05022	5e-05	0.00245985
FPR2	-1.0544	5e-05	0.00245985
PPIF	-1.05623	5e-05	0.00245985
GRASP	-1.0565	0.0003	0.0117558
GADD45A	-1.05727	0.0016	0.0438374
PMAIP1	-1.0577	5e-05	0.00245985
DAPK2	-1.06323	0.00125	0.0367102
C22orf37	-1.0641	5e-05	0.00245985
SLC45A4	-1.06433	5e-05	0.00245985
LOC338758	-1.0725	5e-05	0.00245985
LGR6	-1.0751	0.0002	0.00832099
SLC9A7P1	-1.07552	5e-05	0.00245985
MARCKS	-1.08114	5e-05	0.00245985
OASL	-1.08254	5e-05	0.00245985
JUNB	-1.09341	5e-05	0.00245985
IER3	-1.09488	5e-05	0.00245985
ARL5B	-1.09528	5e-05	0.00245985
GFI1B	-1.09546	5e-05	0.00245985
CDC42EP2	-1.09962	5e-05	0.00245985
SAMSN1	-1.10082	5e-05	0.00245985
KDM6B	-1.10252	5e-05	0.00245985
PDE4B	-1.10385	5e-05	0.00245985
CSF3R	-1.10737	5e-05	0.00245985
RNF144B	-1.11084	5e-05	0.00245985
SLC2A6	-1.1142	5e-05	0.00245985
NPDC1	-1.11563	5e-05	0.00245985
IRS2	-1.12038	5e-05	0.00245985
LOC731424	-1.13449	0.00035	0.01348
PLEK	-1.13561	5e-05	0.00245985
BASP1	-1.14346	5e-05	0.00245985
FOS	-1.14428	5e-05	0.00245985
LOC100652940	-1.14924	5e-05	0.00245985
THBD	-1.15473	0.0001	0.00458503
IFITM2	-1.1648	5e-05	0.00245985
CDKN1A	-1.16519	5e-05	0.00245985
TMEM42	-1.16962	0.0007	0.0231843
SAT1	-1.17162	5e-05	0.00245985
PRSS23	-1.17988	5e-05	0.00245985
DSC2	-1.17993	0.00015	0.00650161
FAM55C,NFKBIZ	-1.17998	5e-05	0.00245985
LIPN	-1.18044	0.001	0.0311316
C1orf183	-1.18362	0.00095	0.0297814
B3GNT7	-1.19602	5e-05	0.00245985
DUSP1	-1.1966	5e-05	0.00245985
LOC100506115	-1.19784	5e-05	0.00245985
C15orf54	-1.20839	0.0004	0.0149363
C5AR1	-1.22177	5e-05	0.00245985
ITPRIP	-1.22602	5e-05	0.00245985
TNFAIP2	-1.23083	5e-05	0.00245985
SLC25A37	-1.24975	5e-05	0.00245985
TRIB1	-1.25048	5e-05	0.00245985
PROK2	-1.25232	0.0002	0.00832099
BCL3	-1.25891	5e-05	0.00245985
PF4	-1.27379	5e-05	0.00245985
FPR1	-1.28536	5e-05	0.00245985
MFSD2A	-1.28718	5e-05	0.00245985
GP1BB,SEPT5	-1.28807	5e-05	0.00245985
IFIT2	-1.29344	5e-05	0.00245985
PER1	-1.29792	5e-05	0.00245985
SIK1	-1.29883	5e-05	0.00245985
NFKBIA	-1.29939	5e-05	0.00245985
BCL2A1	-1.30205	5e-05	0.00245985
SMPDL3A	-1.30288	5e-05	0.00245985
PIM3	-1.30304	5e-05	0.00245985
LIN7A	-1.31107	0.00045	0.0164837
HLA-H	-1.31414	5e-05	0.00245985
RASGEF1B	-1.31554	5e-05	0.00245985
EGR2	-1.31649	5e-05	0.00245985
C9orf7	-1.32314	5e-05	0.00245985
ZFP36	-1.3292	5e-05	0.00245985
CEBPB	-1.33236	5e-05	0.00245985
MAP1LC3A	-1.33306	0.00185	0.0492846
MAFB	-1.34308	5e-05	0.00245985
ZC3H12A	-1.38008	5e-05	0.00245985
SERPINB2	-1.4116	0.0012	0.0357086
STEAP4	-1.41378	5e-05	0.00245985
RNF19B	-1.42335	5e-05	0.00245985
SGK1	-1.43312	5e-05	0.00245985
GZMH	-1.45291	5e-05	0.00245985
LOC100652815	-1.45673	5e-05	0.00245985
AATK	-1.46059	5e-05	0.00245985
NFIL3	-1.4723	5e-05	0.00245985
LRG1	-1.4804	5e-05	0.00245985
LOC100506687	-1.48738	0.00055	0.0194593
NFKBID	-1.49037	5e-05	0.00245985
PTGDS	-1.49166	5e-05	0.00245985
PPP1R15A	-1.50826	5e-05	0.00245985
MYOM2	-1.51215	5e-05	0.00245985
APOBEC3B	-1.52047	0.0006	0.0208454
CLEC4E	-1.52576	5e-05	0.00245985
PLK3	-1.5258	5e-05	0.00245985
RAB20	-1.53731	5e-05	0.00245985
THBS1	-1.5403	5e-05	0.00245985
NINJ1	-1.5411	5e-05	0.00245985
CSRNP1	-1.54695	5e-05	0.00245985
TMEM176B	-1.55484	5e-05	0.00245985
RIPK2	-1.56357	5e-05	0.00245985
VNN3	-1.57235	5e-05	0.00245985
RAB11FIP4	-1.57616	5e-05	0.00245985
DDIT4	-1.58812	5e-05	0.00245985
ETS2	-1.61902	5e-05	0.00245985
MXD1	-1.62733	5e-05	0.00245985
GPR84	-1.63002	5e-05	0.00245985
SDC4	-1.64894	5e-05	0.00245985
CLDN5	-1.67803	0.0007	0.0231843
SOD2	-1.69341	5e-05	0.00245985
TREM1	-1.69423	5e-05	0.00245985
LOC100652892	-1.69869	0.00115	0.0346027
DGAT2	-1.73034	5e-05	0.00245985
PF4V1	-1.74859	5e-05	0.00245985
METRNL	-1.77641	5e-05	0.00245985
NLRP3	-1.8199	5e-05	0.00245985
HBEGF	-1.83463	5e-05	0.00245985
FLJ36644	-1.84135	5e-05	0.00245985
MMP25	-1.84302	5e-05	0.00245985
C22orf45	-1.85608	0.0002	0.00832099
PLIN5	-1.85765	5e-05	0.00245985
NR4A2	-1.87251	5e-05	0.00245985
RGS1	-1.87349	5e-05	0.00245985
EREG	-1.87403	5e-05	0.00245985
TNFAIP3	-1.88207	5e-05	0.00245985
TNF	-1.8935	5e-05	0.00245985
CXCR2	-1.90203	5e-05	0.00245985
LOC100507670	-1.90821	0.00025	0.0101201
PADI2	-1.916	5e-05	0.00245985
CCNJL	-1.94331	5e-05	0.00245985
FFAR2	-1.94728	5e-05	0.00245985
LOC729040	-1.94857	0.00075	0.0245985
BTBD19	-1.97688	5e-05	0.00245985
PLAUR	-2.00958	5e-05	0.00245985
TNFSF9	-2.02634	0.0002	0.00832099
KCNJ2	-2.04407	5e-05	0.00245985
CEACAM3	-2.07576	5e-05	0.00245985
CCL3	-2.0871	5e-05	0.00245985
LYPD2	-2.12082	0.0003	0.0117558
ATF3	-2.12117	5e-05	0.00245985
FOSB	-2.13172	5e-05	0.00245985
ACSL1	-2.19493	5e-05	0.00245985
LOC100505994	-2.20028	5e-05	0.00245985
PFKFB3	-2.20879	5e-05	0.00245985
CXCR1	-2.21633	5e-05	0.00245985
HCAR2	-2.2173	5e-05	0.00245985
KRT1	-2.24045	0.00085	0.027281
DUSP2	-2.25138	5e-05	0.00245985
CYP4F3	-2.25482	5e-05	0.00245985
ICAM1	-2.25999	5e-05	0.00245985
KCNJ15	-2.26437	5e-05	0.00245985
AQP9	-2.26934	5e-05	0.00245985
OSM	-2.34002	5e-05	0.00245985
CD83	-2.34694	5e-05	0.00245985
TNFRSF10C	-2.35836	5e-05	0.00245985
HCAR3	-2.36846	5e-05	0.00245985
NAMPT	-2.37293	5e-05	0.00245985
CXCL2	-2.445	5e-05	0.00245985
UPB1	-2.44936	5e-05	0.00245985
FCGR3B	-2.45999	5e-05	0.00245985
IL1R2	-2.46295	5e-05	0.00245985
IL1RN	-2.46816	5e-05	0.00245985
PTGS2	-2.4805	5e-05	0.00245985
NR4A1	-2.48252	5e-05	0.00245985
IL8	-2.48442	5e-05	0.00245985
EGR1	-2.51677	5e-05	0.00245985
MGAM	-2.52457	5e-05	0.00245985
ADM	-2.54429	5e-05	0.00245985
KRT23	-2.55147	0.0001	0.00458503
CCL4	-2.56319	5e-05	0.00245985
IL1B	-2.60381	5e-05	0.00245985
C11orf10	-2.65564	5e-05	0.00245985
TNFAIP6	-2.70309	5e-05	0.00245985
MME	-2.72979	5e-05	0.00245985
OR2B11	-2.90966	5e-05	0.00245985
CXCL3	-2.97085	5e-05	0.00245985
GPR97	-3.13921	5e-05	0.00245985
IL6	-3.22849	5e-05	0.00245985
C17orf91,MIR22	-3.29907	5e-05	0.00245985
CCL3L1	-3.37615	5e-05	0.00245985
CXCL1	-3.42006	5e-05	0.00245985
ASTL	-3.43181	5e-05	0.00245985
IL1A	-3.45093	5e-05	0.00245985
EGR3	-3.69517	5e-05	0.00245985
G0S2	-3.92543	5e-05	0.00245985
ALPL	-3.97648	5e-05	0.00245985
C7orf43	-4.71483	5e-05	0.00245985
