# Supplementary material for: Frailty in middle age is associated with frailty status and race-specific changes to the transcriptome
Source: Aging (Albany NY). 2019 Aug 8;11(15):5518–34. doi: 10.18632/aging.102135 (PMC6710041; doi:10.18632/aging.102135)
Supplement: Supplementary Table 4 [file aging-11-102135-s003.xlsx]

## Sheet: Biological Process
Supplementary Table 4. Significant frailty-associated biological processes in blacks.
Gene Ontology Term	Annotation	NumGeneInSampleGOTerm	Z_Score
GO0015671 OXYGEN TRANSPORT	[GO0015671:(CLASS:biological_process)oxygen transport]The directed movement of oxygen (O2) into, out of, within or between cells.	9	-4.18007
GO0006817 PHOSPHATE TRANSPORT	[GO0006817:(CLASS:biological_process)phosphate transport]The directed movement of phosphate into, out of, within or between cells.	57	-3.23646
GO0050909 SENSORY PERCEPTION OF TASTE	[GO0050909:(CLASS:biological_process)sensory perception of taste]The series of events required for an organism to receive a gustatory stimulus, convert it to a molecular signal, and recognize and characterize the signal. Gustation involves the direct detection of chemical composition, usually through contact with chemoreceptor cells.	10	-2.42125
GO0007160 CELL MATRIX ADHESION	[GO0007160:(CLASS:biological_process)cell-matrix adhesion]The binding of a cell to the extracellular matrix via adhesion molecules.	53	-1.83859
GO0001759 INDUCTION OF AN ORGAN	[GO0001759:(CLASS:biological_process)induction of an organ]The close range interaction of two or more cells or tissues that causes them to change their fates and specify the development of an organ.	8	-1.63901
GO0045061 THYMIC T CELL SELECTION	[GO0045061:(CLASS:biological_process)thymic T cell selection]The process of T cell selection that occurs in the thymus.	4	-0.852208
GO0046649 LYMPHOCYTE ACTIVATION	[GO0046649:(CLASS:biological_process)lymphocyte activation]A change in morphology and behavior of a lymphocyte resulting from exposure to a specific antigen, mitogen, cytokine, chemokine, cellular ligand, or soluble factor.	4	-0.835098
GO0009190 CYCLIC NUCLEOTIDE BIOSYNTHETIC PROCESS	[GO0009190:(CLASS:biological_process)cyclic nucleotide biosynthetic process]The chemical reactions and pathways resulting in the formation of a cyclic nucleotide, a nucleotide in which the phosphate group is in diester linkage to two positions on the sugar residue.	13	-0.783371
GO0060041 RETINA DEVELOPMENT IN CAMERA TYPE EYE	[GO0060041:(CLASS:biological_process)retina development in camera-type eye]The process whose specific outcome is the progression of the retina over time, from its formation to the mature structure. The retina is the innermost layer or coating at the back of the eyeball, which is sensitive to light and in which the optic nerve terminates.	4	-0.739005
GO0042254 RIBOSOME BIOGENESIS AND ASSEMBLY	[GO0042254:(CLASS:biological_process)ribosome biogenesis and assembly]The process of the formation of the constituents of the ribosome subunits, their assembly, and their transport to the sites of protein synthesis.	84	-0.615878
GO0007044 CELL SUBSTRATE JUNCTION ASSEMBLY	[GO0007044:(CLASS:biological_process)cell-substrate junction assembly]The assembly of abundant stress fibers, which help maintain cell shapes and adhere cells to the substratum.	5	-0.579837
GO0046326 POSITIVE REGULATION OF GLUCOSE IMPORT	[GO0046326:(CLASS:biological_process)positive regulation of glucose import]Any process that activates or increases the frequency, rate or extent of the import of the hexose monosaccharide glucose into a cell or organelle.	3	-0.18121
GO0007386 COMPARTMENT SPECIFICATION	[GO0007386:(CLASS:biological_process)compartment specification]The regionalization process by which embryonic segments are divided into compartments that will result in differences in cell differentiation.	3	0.236981
GO0019222 REGULATION OF METABOLIC PROCESS	[GO0019222:(CLASS:biological_process)regulation of metabolic process]Any process that modulates the frequency, rate or extent of the chemical reactions and pathways within a cell or an organism.	6	0.357612
GO0006983 ER OVERLOAD RESPONSE	[GO0006983:(CLASS:biological_process)ER overload response]The series of molecular signals generated by the accumulation of normal or misfolded proteins in the endoplasmic reticulum and leading to activation of transcription by NF-kappaB.	4	0.432496
GO0000278 MITOTIC CELL CYCLE	[GO0000278:(CLASS:biological_process)mitotic cell cycle]Progression through the phases of the mitotic cell cycle, the most common eukaryotic cell cycle, which canonically comprises four successive phases called G1, S, G2, and M and includes replication of the genome and the subsequent segregation of chromosomes into daughter cells. In some variant cell cycles nuclear replication or nuclear divisi…	6	0.450138
GO0006097 GLYOXYLATE CYCLE	[GO0006097:(CLASS:biological_process)glyoxylate cycle]A modification of the TCA cycle occurring in some plants and microorganisms, in which isocitrate is cleaved to glyoxylate and succinate. Glyoxylate can then react with acetyl-CoA to form malate.	3	0.511391
GO0009617 RESPONSE TO BACTERIUM	[GO0009617:(CLASS:biological_process)response to bacterium]A change in state or activity of a cell or an organism (in terms of movement, secretion, enzyme production, gene expression, etc.) as a result of a stimulus from a bacterium.	8	0.533248
GO0006098 PENTOSE PHOSPHATE SHUNT	[GO0006098:(CLASS:biological_process)pentose-phosphate shunt]The process by which glucose is oxidized, coupled to NADPH synthesis. Glucose 6-P is oxidized with the formation of carbon dioxide (CO2), ribulose 5-phosphate and reduced NADP; ribulose 5-P then enters a series of reactions interconverting sugar phosphates. The pentose phosphate pathway is a major source of reducing equivalents for bios…	7	0.636392
GO0002224 TOLL LIKE RECEPTOR SIGNALING PATHWAY	[GO0002224:(CLASS:biological_process)toll-like receptor signaling pathway]Any series of molecular signals generated as a consequence of binding to a toll-like receptor. Toll-like receptors directly bind pattern motifs from a variety of microbial sources to initiate innate immune response.	4	0.781233
GO0006281 DNA REPAIR	[GO0006281:(CLASS:biological_process)DNA repair]The process of restoring DNA after damage. Genomes are subject to damage by chemical and physical agents in the environment (e.g. UV and ionizing radiations, chemical mutagens, fungal and bacterial toxins, etc.) and by free radicals or alkylating agents endogenously generated in metabolism. DNA is also damaged because of errors during its replicatio…	183	0.800859
GO0006302 DOUBLE STRAND BREAK REPAIR	[GO0006302:(CLASS:biological_process)double-strand break repair]The repair of double-strand breaks in DNA via homologous and nonhomologous mechanisms to reform a continuous DNA helix.	16	0.840765
GO0009268 RESPONSE TO PH	[GO0009268:(CLASS:biological_process)response to pH]A change in state or activity of a cell or an organism (in terms of movement, secretion, enzyme production, gene expression, etc.) as a result of a pH stimulus.	4	0.892039
GO0006944 MEMBRANE FUSION	[GO0006944:(CLASS:biological_process)membrane fusion]The joining of two lipid bilayers to form a single membrane.	15	0.896586
GO0006974 RESPONSE TO DNA DAMAGE STIMULUS	[GO0006974:(CLASS:biological_process)response to DNA damage stimulus]A change in state or activity of a cell or an organism (in terms of movement, secretion, enzyme production, gene expression, etc.) as a result of a stimulus indicating damage to its DNA from environmental insults or errors during metabolism.	160	0.913468
GO0007051 SPINDLE ORGANIZATION AND BIOGENESIS	[GO0007051:(CLASS:biological_process)spindle organization and biogenesis]A process that is carried out at the cellular level which results in the formation, arrangement of constituent parts, or disassembly of the spindle, the array of microtubules and associated molecules that forms between opposite poles of a eukaryotic cell during DNA segregation and serves to move the duplicated chromosomes ap…	10	0.916485
GO0002238 RESPONSE TO MOLECULE OF FUNGAL ORIGIN	[GO0002238:(CLASS:biological_process)response to molecule of fungal origin]A change in state or activity of an organism (in terms of movement, secretion, enzyme production, gene expression, etc.) as a result of the detection of molecules of fungal origin such as chito-octomer oligosaccharide.	3	0.921682
GO0030099 MYELOID CELL DIFFERENTIATION	[GO0030099:(CLASS:biological_process)myeloid cell differentiation]The process whereby a relatively unspecialized myeloid precursor cell acquires the specialized features of any cell of the myeloid leukocyte, megakaryocyte, thrombocyte, or erythrocyte lineages.	12	0.985536
GO0042542 RESPONSE TO HYDROGEN PEROXIDE	[GO0042542:(CLASS:biological_process)response to hydrogen peroxide]A change in state or activity of a cell or an organism (in terms of movement, secretion, enzyme production, gene expression, etc.) as a result of a hydrogen peroxide (H2O2) stimulus.	6	0.995293
GO0002467 GERMINAL CENTER FORMATION	[GO0002467:(CLASS:biological_process)germinal center formation]The process by which germinal centers form. A germinal center is a specialized microenvironment formed when activated B cells enter lymphoid follicles. Germinal centers are the foci for B cell proliferation and somatic hypermutation.	3	0.999868
GO0000070 MITOTIC SISTER CHROMATID SEGREGATION	[GO0000070:(CLASS:biological_process)mitotic sister chromatid segregation]The cell cycle process whereby replicated homologous chromosomes are organized and then physically separated and apportioned to two sets during the mitotic cell cycle. Each replicated chromosome, composed of two sister chromatids, aligns at the cell equator, paired with its homologous partner. One homolog of each morphologi…	11	1.04214
GO0006511 UBIQUITIN DEPENDENT PROTEIN CATABOLIC PR	[GO0006511:(CLASS:biological_process)ubiquitin-dependent protein catabolic process]The chemical reactions and pathways resulting in the breakdown of a protein or peptide by hydrolysis of its peptide bonds, initiated by the covalent attachment of a ubiquitin moiety, or multiple ubiquitin moieties, to the protein.	110	1.05284
GO0006892 POST GOLGI VESICLE MEDIATED TRANSPORT	[GO0006892:(CLASS:biological_process)post-Golgi vesicle-mediated transport]The directed movement of substances from the Golgi to other parts of the cell, including organelles and the plasma membrane, mediated by small transport vesicles.	5	1.07224
GO0006260 DNA REPLICATION	[GO0006260:(CLASS:biological_process)DNA replication]The process whereby new strands of DNA are synthesized. The template for replication can either be an existing DNA molecule or RNA.	116	1.11369
GO0032760 POSITIVE REGULATION OF TUMOR NECROSIS FA	[GO0032760:(CLASS:biological_process)positive regulation of tumor necrosis factor production]Any process that activates or increases the frequency, rate, or extent of tumor necrosis factor production.	7	1.13474
GO0007001 CHROMOSOME ORGANIZATION AND BIOGENESIS	[GO0007001:(CLASS:biological_process)chromosome organization and biogenesis (sensu Eukaryota)]A process that is carried out at the cellular level which results in the formation, arrangement of constituent parts, or disassembly of eukaryotic chromosomes, structures composed of a very long molecule of DNA and associated proteins (e.g. histones) that carries hereditary information. As in, but not re…	76	1.25156
GO0050877 NEUROLOGICAL PROCESS	[GO0050877:(CLASS:biological_process)neurological process]The processes pertaining to the functions of the nervous system of an organism.	5	1.28406
GO0032020 ISG15 PROTEIN CONJUGATION	[GO0032020:(CLASS:biological_process)ISG15-protein conjugation]The covalent addition to a protein of ISG15, a ubiquitin-like protein.	4	1.37305
GO0006417 REGULATION OF TRANSLATION	[GO0006417:(CLASS:biological_process)regulation of translation]Any process that modulates the frequency, rate or extent of the chemical reactions and pathways resulting in the formation of proteins by the translation of mRNA.	41	1.44642
GO0007260 TYROSINE PHOSPHORYLATION OF STAT PROTEIN	[GO0007260:(CLASS:biological_process)tyrosine phosphorylation of STAT protein]The process of introducing a phosphate group to a tyrosine residue of a STAT (Signal Transducer and Activator of Transcription) protein.	4	1.44786
GO0000082 G1 OR S TRANSITION OF MITOTIC CELL CYCLE	[GO0000082:(CLASS:biological_process)G1/S transition of mitotic cell cycle]Progression from G1 phase to S phase of the mitotic cell cycle.	39	1.56565
GO0000910 CYTOKINESIS	[GO0000910:(CLASS:biological_process)cytokinesis]A cellular process resulting in the division of the cytoplasm of a cell and its separation into two daughter cells. Cytokinesis usually occurs after growth, replication, and segregation of cellular components.	33	1.59614
GO0006915 APOPTOSIS	[GO0006915:(CLASS:biological_process)apoptosis]A form of programmed cell death induced by external or internal signals that trigger the activity of proteolytic caspases, whose actions dismantle the cell and result in cell death. Apoptosis begins internally with condensation and subsequent fragmentation of the cell nucleus (blebbing) while the plasma membrane remains intact. Other characteristics …	362	1.67708
GO0006457 PROTEIN FOLDING	[GO0006457:(CLASS:biological_process)protein folding]The process of assisting in the covalent and noncovalent assembly of single chain polypeptides or multisubunit complexes into the correct tertiary structure.	191	1.68573
GO0006730 ONE CARBON COMPOUND METABOLIC PROCESS	[GO0006730:(CLASS:biological_process)one-carbon compound metabolic process]The chemical reactions and pathways involving compounds containing a single carbon atom.	13	1.8137
GO0006334 NUCLEOSOME ASSEMBLY	[GO0006334:(CLASS:biological_process)nucleosome assembly]The aggregation and bonding together of a nucleosome, the beadlike structural units of eukaryotic chromatin composed of histones and DNA.	75	1.94061
GO0045416 POSITIVE REGULATION OF INTERLEUKIN 8 BIO	[GO0045416:(CLASS:biological_process)positive regulation of interleukin-8 biosynthetic process]Any process that activates or increases the frequency, rate or extent of the chemical reactions and pathways resulting in the formation of interleukin-8.	4	2.11121
GO0042088 T HELPER 1 TYPE IMMUNE RESPONSE	[GO0042088:(CLASS:biological_process)T-helper 1 type immune response]An immune response which is associated with resistance to intracellular bacteria, fungi, and protozoa, and pathological conditions such as arthritis, and which is typically orchestrated by the production of particular cytokines by T-helper 1 cells, most notably interferon-gamma, IL-2, and lymphotoxin.	10	2.16633
GO0048661 POSITIVE REGULATION OF SMOOTH MUSCLE CEL	[GO0048661:(CLASS:biological_process)positive regulation of smooth muscle cell proliferation]Any process that activates or increases the rate or extent of smooth muscle cell proliferation.	5	2.28687
GO0045089 POSITIVE REGULATION OF INNATE IMMUNE RES	[GO0045089:(CLASS:biological_process)positive regulation of innate immune response]Any process that activates or increases the frequency, rate or extent of the innate immune response, the organism's first line of defense against infection.	5	2.30293
GO0007165 SIGNAL TRANSDUCTION	[GO0007165:(CLASS:biological_process)signal transduction]The cascade of processes by which a signal interacts with a receptor, causing a change in the level or activity of a second messenger or other downstream target, and ultimately effecting a change in the functioning of the cell.	1004	2.36157
GO0007067 MITOSIS	[GO0007067:(CLASS:biological_process)mitosis]Progression through mitosis, the division of the eukaryotic cell nucleus to produce two daughter nuclei that, usually, contain the identical chromosome complement to their mother.	143	2.42092
GO0051301 CELL DIVISION	[GO0051301:(CLASS:biological_process)cell division]The processes resulting in the physical partitioning and separation of a cell into daughter cells.	194	2.48789
GO0008284 POSITIVE REGULATION OF CELL PROLIFERATIO	[GO0008284:(CLASS:biological_process)positive regulation of cell proliferation]Any process that activates or increases the rate or extent of cell proliferation.	159	2.54416
GO0007049 CELL CYCLE	[GO0007049:(CLASS:biological_process)cell cycle]The progression of biochemical and morphological phases and events that occur in a cell during successive cell replication or nuclear replication events. Canonically, the cell cycle comprises the replication and segregation of genetic material followed by the division of the cell, but in endocycles or syncytial cells nuclear replication or nuclear d…	418	2.58047
GO0005513 DETECTION OF CALCIUM ION	[GO0005513:(CLASS:biological_process)detection of calcium ion]The series of events in which a calcium ion stimulus is received by a cell and converted into a molecular signal.	3	2.69338
GO0007094 MITOTIC CELL CYCLE SPINDLE ASSEMBLY CHEC	[GO0007094:(CLASS:biological_process)mitotic cell cycle spindle assembly checkpoint]A signal transduction based surveillance mechanism that ensures the fidelity of cell division by preventing the premature advance of cells from metaphase to anaphase prior to the successful attachment of kinetochores to spindle microtubules (spindle assembly).	9	2.74414
GO0000074 REGULATION OF PROGRESSION THROUGH CELL C	[GO0000074:(CLASS:biological_process)regulation of progression through cell cycle]Any process that modulates the rate or extent of progression through the cell cycle.	238	3.16244
GO0006959 HUMORAL IMMUNE RESPONSE	[GO0006959:(CLASS:biological_process)humoral immune response]An immune response mediated through a body fluid.	30	3.69004
GO0001937 NEGATIVE REGULATION OF ENDOTHELIAL CELL	[GO0001937:(CLASS:biological_process)negative regulation of endothelial cell proliferation]Any process that stops, prevents, or reduces the rate or extent of endothelial cell proliferation.	4	4.2874
GO0007267 CELL CELL SIGNALING	[GO0007267:(CLASS:biological_process)cell-cell signaling]Any process that mediates the transfer of information from one cell to another.	172	4.33693
GO0046888 NEGATIVE REGULATION OF HORMONE SECRETION	[GO0046888:(CLASS:biological_process)negative regulation of hormone secretion]Any process that stops, prevents or reduces the frequency, rate or extent of the regulated release of a hormone from a cell or group of cells.	6	4.42327
GO0006935 CHEMOTAXIS	[GO0006935:(CLASS:biological_process)chemotaxis]The directed movement of a motile cell or organism, or the directed growth of a cell guided by a specific chemical concentration gradient. Movement may be towards a higher concentration (positive chemotaxis) or towards a lower concentration (negative chemotaxis).	85	5.12249
GO0006954 INFLAMMATORY RESPONSE	[GO0006954:(CLASS:biological_process)inflammatory response]The immediate defensive reaction (by vertebrate tissue) to infection or injury caused by chemical or physical agents. The process is characterized by local vasodilation, extravasation of plasma into intercellular spaces and accumulation of white blood cells and macrophages.	161	6.28302
GO0006955 IMMUNE RESPONSE	[GO0006955:(CLASS:biological_process)immune response]Any immune system process that functions in the calibrated response of an organism to a potential internal or invasive threat.	299	7.11128
GO0001660 FEVER	[GO0001660:(CLASS:biological_process)fever]A rise in body temperature above the normal, often as a response to infection.	3	9.03708
