# Supplementary material for: Frailty in middle age is associated with frailty status and race-specific changes to the transcriptome
Source: Aging (Albany NY). 2019 Aug 8;11(15):5518–34. doi: 10.18632/aging.102135 (PMC6710041; doi:10.18632/aging.102135)
Supplement: Supplementary Table 5 [file aging-11-102135-s005.xlsx]

## Sheet: Table S4
SupplementaryTable 5. Significant frailty-associated biological processes in whites.
Gene Ontology Term	Annotation	NumGeneInSampleGOTerm	Z_Score
GO0006954 INFLAMMATORY RESPONSE	[GO0006954:(CLASS:biological_process)inflammatory response]The immediate defensive reaction (by vertebrate tissue) to infection or injury caused by chemical or physical agents. The process is characterized by local vasodilation, extravasation of plasma into intercellular spaces and accumulation of white blood cells and macrophages.	166	-7.31898
GO0006935 CHEMOTAXIS	[GO0006935:(CLASS:biological_process)chemotaxis]The directed movement of a motile cell or organism, or the directed growth of a cell guided by a specific chemical concentration gradient. Movement may be towards a higher concentration (positive chemotaxis) or towards a lower concentration (negative chemotaxis).	88	-7.07649
GO0006955 IMMUNE RESPONSE	[GO0006955:(CLASS:biological_process)immune response]Any immune system process that functions in the calibrated response of an organism to a potential internal or invasive threat.	306	-5.73468
GO0007267 CELL CELL SIGNALING	[GO0007267:(CLASS:biological_process)cell-cell signaling]Any process that mediates the transfer of information from one cell to another.	183	-5.41489
GO0045778 POSITIVE REGULATION OF OSSIFICATION	[GO0045778:(CLASS:biological_process)positive regulation of ossification]Any process that activates or increases the frequency, rate or extent of bone formation.	3	-4.74328
GO0042119 NEUTROPHIL ACTIVATION	[GO0042119:(CLASS:biological_process)neutrophil activation]The change in morphology and behavior of a neutrophil resulting from exposure to a cytokine, chemokine, cellular ligand, or soluble factor.	5	-4.72442
GO0007165 SIGNAL TRANSDUCTION	[GO0007165:(CLASS:biological_process)signal transduction]The cascade of processes by which a signal interacts with a receptor, causing a change in the level or activity of a second messenger or other downstream target, and ultimately effecting a change in the functioning of the cell.	1055	-4.61779
GO0007186 G PROTEIN COUPLED RECEPTOR PROTEIN SIGNA	[GO0007186:(CLASS:biological_process)G-protein coupled receptor protein signaling pathway]The series of molecular signals generated as a consequence of a G-protein coupled receptor binding to its physiological ligand.	436	-4.48932
GO0001525 ANGIOGENESIS	[GO0001525:(CLASS:biological_process)angiogenesis]Blood vessel formation when new vessels emerge from the proliferation of pre-existing blood vessels.	99	-4.21654
GO0046888 NEGATIVE REGULATION OF HORMONE SECRETION	[GO0046888:(CLASS:biological_process)negative regulation of hormone secretion]Any process that stops, prevents or reduces the frequency, rate or extent of the regulated release of a hormone from a cell or group of cells.	6	-4.17667
GO0050930 INDUCTION OF POSITIVE CHEMOTAXIS	[GO0050930:(CLASS:biological_process)induction of positive chemotaxis]Any process that initiates the directed movement of a motile cell or organism towards a higher concentration in a concentration gradient of a specific chemical.	9	-4.17551
GO0007275 MULTICELLULAR ORGANISMAL DEVELOPMENT	[GO0007275:(CLASS:biological_process)multicellular organismal development]The biological process whose specific outcome is the progression of an organism over time from an initial condition (e.g. a zygote or a young adult) to a later condition (e.g. a multicellular animal or an aged adult).	711	-4.0758
GO0030593 NEUTROPHIL CHEMOTAXIS	[GO0030593:(CLASS:biological_process)neutrophil chemotaxis]The directed movement of a neutrophil cell, the most numerous polymorphonuclear leukocyte found in the blood, in response to an external stimulus, usually an infection or wounding.	18	-4.04453
GO0042472 INNER EAR MORPHOGENESIS	[GO0042472:(CLASS:biological_process)inner ear morphogenesis]The process by which the anatomical structures of the inner ear are generated and organized. Morphogenesis pertains to the creation of form. The inner ear is the structure in vertebrates that contains the organs of balance and hearing. It consists of soft hollow sensory structures (the membranous labyrinth) containing fluid (endolymph) …	34	-3.86346
GO0042742 DEFENSE RESPONSE TO BACTERIUM	[GO0042742:(CLASS:biological_process)defense response to bacterium]Reactions triggered in response to the presence of a bacterium that act to protect the cell or organism.	35	-3.76447
GO0006915 APOPTOSIS	[GO0006915:(CLASS:biological_process)apoptosis]A form of programmed cell death induced by external or internal signals that trigger the activity of proteolytic caspases, whose actions dismantle the cell and result in cell death. Apoptosis begins internally with condensation and subsequent fragmentation of the cell nucleus (blebbing) while the plasma membrane remains intact. Other characteristics …	372	-3.51569
GO0030154 CELL DIFFERENTIATION	[GO0030154:(CLASS:biological_process)cell differentiation]The process whereby relatively unspecialized cells, e.g. embryonic or regenerative cells, acquire specialized structural and/or functional features that characterize the cells, tissues, or organs of the mature organism or some other relatively stable phase of the organism's life history. Differentiation includes the processes involved in c…	378	-3.48505
GO0008284 POSITIVE REGULATION OF CELL PROLIFERATIO	[GO0008284:(CLASS:biological_process)positive regulation of cell proliferation]Any process that activates or increases the rate or extent of cell proliferation.	162	-3.45803
GO0006917 INDUCTION OF APOPTOSIS	[GO0006917:(CLASS:biological_process)induction of apoptosis]A process that directly activates any of the steps required for cell death by apoptosis.	91	-3.34786
GO0006334 NUCLEOSOME ASSEMBLY	[GO0006334:(CLASS:biological_process)nucleosome assembly]The aggregation and bonding together of a nucleosome, the beadlike structural units of eukaryotic chromatin composed of histones and DNA.	76	-3.32754
GO0045087 INNATE IMMUNE RESPONSE	[GO0045087:(CLASS:biological_process)innate immune response]Innate immune responses are defense responses mediated by germline encoded components that directly recognize components of potential pathogens.	60	-3.28074
GO0042088 T HELPER 1 TYPE IMMUNE RESPONSE	[GO0042088:(CLASS:biological_process)T-helper 1 type immune response]An immune response which is associated with resistance to intracellular bacteria, fungi, and protozoa, and pathological conditions such as arthritis, and which is typically orchestrated by the production of particular cytokines by T-helper 1 cells, most notably interferon-gamma, IL-2, and lymphotoxin.	10	-3.21452
GO0009615 RESPONSE TO VIRUS	[GO0009615:(CLASS:biological_process)response to virus]A change in state or activity of a cell or an organism (in terms of movement, secretion, enzyme production, gene expression, etc.) as a result of a stimulus from a virus.	51	-3.20176
GO0006956 COMPLEMENT ACTIVATION	[GO0006956:(CLASS:biological_process)complement activation]Processes involved in the activation of any of the steps of the complement cascade, which allows for the direct killing of microbes, the disposal of immune complexes, and the regulation of other immune processes; the initial steps of complement activation involve one of three pathways, the classical pathway, the alternative pathway, and t…	20	-3.1243
GO0045740 POSITIVE REGULATION OF DNA REPLICATION	[GO0045740:(CLASS:biological_process)positive regulation of DNA replication]Any process that activates or increases the frequency, rate or extent of DNA replication.	3	-2.99797
GO0000074 REGULATION OF PROGRESSION THROUGH CELL C	[GO0000074:(CLASS:biological_process)regulation of progression through cell cycle]Any process that modulates the rate or extent of progression through the cell cycle.	239	-2.9843
GO0006928 CELL MOTILITY	[GO0006928:(CLASS:biological_process)cell motility]Any process involved in the controlled movement of a cell.	97	-2.969
GO0016080 SYNAPTIC VESICLE TARGETING	[GO0016080:(CLASS:biological_process)synaptic vesicle targeting]The process by which synaptic vesicles are directed to specific destination membranes, mediated by molecules at the vesicle membrane and target membrane surfaces.	3	-2.9574
GO0008283 CELL PROLIFERATION	[GO0008283:(CLASS:biological_process)cell proliferation]The multiplication or reproduction of cells, resulting in the rapid expansion of a cell population.	230	-2.94639
GO0006958 COMPLEMENT ACTIVATION CLASSICAL PATHWAY	[GO0006958:(CLASS:biological_process)complement activation, classical pathway]Processes involved in the activation of any of the steps of the classical pathway of the complement cascade which allows for the direct killing of microbes, the disposal of immune complexes, and the regulation of other immune processes.	17	-2.88335
GO0006959 HUMORAL IMMUNE RESPONSE	[GO0006959:(CLASS:biological_process)humoral immune response]An immune response mediated through a body fluid.	30	-2.87055
GO0019835 CYTOLYSIS	[GO0019835:(CLASS:biological_process)cytolysis]The rupture of cell membranes and the loss of cytoplasm.	13	-2.82826
GO0045741 POSITIVE REGULATION OF EPIDERMAL GROWTH	[GO0045741:(CLASS:biological_process)positive regulation of epidermal growth factor receptor activity]Any process that activates or increases the frequency, rate or extent of epidermal growth factor receptor activity.	5	-2.69137
GO0006979 RESPONSE TO OXIDATIVE STRESS	[GO0006979:(CLASS:biological_process)response to oxidative stress]A change in state or activity of a cell or an organism (in terms of movement, secretion, enzyme production, gene expression, etc.) as a result of oxidative stress, a state often resulting from exposure to high levels of reactive oxygen species, e.g. superoxide anions, hydrogen peroxide (H2O2), and hydroxyl radicals.	55	-2.61444
GO0006629 LIPID METABOLIC PROCESS	[GO0006629:(CLASS:biological_process)lipid metabolic process]The chemical reactions and pathways involving lipids, compounds soluble in an organic solvent but not, or sparingly, in an aqueous solvent. Includes fatty acids; neutral fats, other fatty-acid esters, and soaps; long-chain (fatty) alcohols and waxes; sphingoids and other long-chain bases; glycolipids, phospholipids and sphingolipids; an…	206	-2.44366
GO0002467 GERMINAL CENTER FORMATION	[GO0002467:(CLASS:biological_process)germinal center formation]The process by which germinal centers form. A germinal center is a specialized microenvironment formed when activated B cells enter lymphoid follicles. Germinal centers are the foci for B cell proliferation and somatic hypermutation.	3	-2.4131
GO0007160 CELL MATRIX ADHESION	[GO0007160:(CLASS:biological_process)cell-matrix adhesion]The binding of a cell to the extracellular matrix via adhesion molecules.	54	-2.37688
GO0006968 CELLULAR DEFENSE RESPONSE	[GO0006968:(CLASS:biological_process)cellular defense response]A defense response that is mediated by cells.	45	-2.37385
GO0007001 CHROMOSOME ORGANIZATION AND BIOGENESIS (	[GO0007001:(CLASS:biological_process)chromosome organization and biogenesis (sensu Eukaryota)]A process that is carried out at the cellular level which results in the formation, arrangement of constituent parts, or disassembly of eukaryotic chromosomes, structures composed of a very long molecule of DNA and associated proteins (e.g. histones) that carries hereditary information. As in, but not re…	78	-2.30813
GO0006729 TETRAHYDROBIOPTERIN BIOSYNTHETIC PROCESS	[GO0006729:(CLASS:biological_process)tetrahydrobiopterin biosynthetic process]The chemical reactions and pathways resulting in the formation of tetrahydrobiopterin, the reduced form of biopterin (2-amino-4-hydroxy-6-(1,2-dihydroxypropyl)-pteridine). It functions as a hydroxylation coenzyme, e.g. in the conversion of phenylalanine to tyrosine.	8	-2.29188
GO0006952 DEFENSE RESPONSE	[GO0006952:(CLASS:biological_process)defense response]Reactions, triggered in response to the presence of a foreign body or the occurrence of an injury, which result in restriction of damage to the organism attacked or prevention/recovery from the infection caused by the attack.	100	-2.20361
GO0007599 HEMOSTASIS	[GO0007599:(CLASS:biological_process)hemostasis]The stopping of bleeding (loss of body fluid) or the arrest of the circulation to an organ or part.	10	-2.13653
GO0001568 BLOOD VESSEL DEVELOPMENT	[GO0001568:(CLASS:biological_process)blood vessel development]The process whose specific outcome is the progression of the blood vessel over time, from its formation to the mature structure. The blood vessel is the vasculature carrying blood.	37	-2.1241
GO0043065 POSITIVE REGULATION OF APOPTOSIS	[GO0043065:(CLASS:biological_process)positive regulation of apoptosis]Any process that activates or increases the frequency, rate or extent of cell death by apoptosis.	58	-2.04764
GO0042246 TISSUE REGENERATION	[GO0042246:(CLASS:biological_process)tissue regeneration]The regrowth of lost or destroyed tissues.	5	-2.04603
GO0000122 NEGATIVE REGULATION OF TRANSCRIPTION FROM RNA POLYMERASE II PROMOTER, GLOBAL	[GO0000122:(CLASS:biological_process)negative regulation of transcription from RNA polymerase II promoter]Any process that stops, prevents or reduces the frequency, rate or extent of transcription from an RNA polymerase II promoter.	162	-2.04157
GO0005975 CARBOHYDRATE METABOLIC PROCESS	[GO0005975:(CLASS:biological_process)carbohydrate metabolic process]The chemical reactions and pathways involving carbohydrates, any of a group of organic compounds based of the general formula Cx(H2O)y.	162	-2.03757
GO0001892 EMBRYONIC PLACENTA DEVELOPMENT	[GO0001892:(CLASS:biological_process)embryonic placenta development]The embryonically driven process whose specific outcome is the progression of the placenta over time, from its formation to the mature structure. The placenta is an organ of metabolic interchange between fetus and mother, partly of embryonic origin and partly of maternal origin.	12	-1.98036
GO0030182 NEURON DIFFERENTIATION	[GO0030182:(CLASS:biological_process)neuron differentiation]The process whereby a relatively unspecialized cell acquires specialized features of a neuron.	32	-1.97197
GO0045429 POSITIVE REGULATION OF NITRIC OXIDE BIOS	[GO0045429:(CLASS:biological_process)positive regulation of nitric oxide biosynthetic process]Any process that activates or increases the frequency, rate or extent of the chemical reactions and pathways resulting in the formation of nitric oxide.	7	-1.91696
GO0045860 POSITIVE REGULATION OF PROTEIN KINASE AC	[GO0045860:(CLASS:biological_process)positive regulation of protein kinase activity]Any process that activates or increases the frequency, rate or extent of protein kinase activity.	15	-1.90416
GO0006810 TRANSPORT	[GO0006810:(CLASS:biological_process)transport]The directed movement of substances (such as macromolecules, small molecules, ions) into, out of, within or between cells.	1300	-1.88877
GO0050766 POSITIVE REGULATION OF PHAGOCYTOSIS	[GO0050766:(CLASS:biological_process)positive regulation of phagocytosis]Any process that activates or increases the frequency, rate or extent of phagocytosis.	14	-1.84652
GO0046677 RESPONSE TO ANTIBIOTIC	[GO0046677:(CLASS:biological_process)response to antibiotic]A change in state or activity of a cell or an organism (in terms of movement, secretion, enzyme production, gene expression, etc.) as a result of an antibiotic stimulus. An antibiotic is a chemical substance produced by a microorganism which has the capacity to inhibit the growth of or to kill other microorganisms.	6	-1.79948
GO0007264 SMALL GTPASE MEDIATED SIGNAL TRANSDUCTIO	[GO0007264:(CLASS:biological_process)small GTPase mediated signal transduction]Any series of molecular signals in which a small monomeric GTPase relays one or more of the signals.	187	-1.71122
GO0045416 POSITIVE REGULATION OF INTERLEUKIN 8 BIO	[GO0045416:(CLASS:biological_process)positive regulation of interleukin-8 biosynthetic process]Any process that activates or increases the frequency, rate or extent of the chemical reactions and pathways resulting in the formation of interleukin-8.	5	-1.70222
GO0016311 DEPHOSPHORYLATION	[GO0016311:(CLASS:biological_process)dephosphorylation]The process of removing one or more phosphoric (ester or anhydride) residues from a molecule.	71	-1.66442
GO0050832 DEFENSE RESPONSE TO FUNGUS	[GO0050832:(CLASS:biological_process)defense response to fungus]Reactions triggered in response to the presence of a fungus that act to protect the cell or organism.	4	-1.65288
GO0016064 IMMUNOGLOBULIN MEDIATED IMMUNE RESPONSE	[GO0016064:(CLASS:biological_process)immunoglobulin mediated immune response]An immune response mediated by immunoglobulins, whether cell-bound or in solution.	15	-1.5786
GO0060088 AUDITORY RECEPTOR CELL STEREOCILIUM ORGA	[GO0060088:(CLASS:biological_process)auditory receptor cell stereocilium organization and biogenesis]A process that is carried out at the cellular level which results in the formation, arrangement of constituent parts, or disassembly of a stereocilium. A stereocilium is an actin-based protrusion from the apical surface of auditory hair cells.	9	-1.52554
GO0045786 NEGATIVE REGULATION OF PROGRESSION THROU	[GO0045786:(CLASS:biological_process)negative regulation of progression through cell cycle]Any process that stops, prevents or reduces the frequency, rate or extent of progression through the cell cycle.	105	-1.48513
GO0032496 RESPONSE TO LIPOPOLYSACCHARIDE	[GO0032496:(CLASS:biological_process)response to lipopolysaccharide]A change in state or activity of an organism (in terms of movement, secretion, enzyme production, gene expression, etc.) as a result of the detection of lipopolysaccharide, a major component of the cell wall of gram-negative bacteria.	10	-1.46906
GO0048041 FOCAL ADHESION FORMATION	[GO0048041:(CLASS:biological_process)focal adhesion formation]Establishment and maturation of focal adhesions, complexes of intracellular signaling and structural proteins which provide a structural link between the internal actin cytoskeleton and the ECM, and also function as a locus of signal transduction activity.	13	-1.4583
GO0006818 HYDROGEN TRANSPORT	[GO0006818:(CLASS:biological_process)hydrogen transport]The directed movement of hydrogen (H2 or H+), into, out of, within or between cells.	9	-1.44237
GO0015992 PROTON TRANSPORT	[GO0015992:(CLASS:biological_process)proton transport]The directed movement of protons (hydrogen ions) into, out of, within or between cells.	52	-1.42869
GO0007354 ZYGOTIC DETERMINATION OF ANTERIOR OR POSTERIOR AXIS, EMBRYO	[GO0007354:(CLASS:biological_process)zygotic determination of anterior/posterior axis, embryo]The specification of the anterior/posterior axis of the embryo by products of genes expressed in the zygote; exemplified in insects by the gap genes, pair rule genes and segment polarity gene cascade.	3	-1.27224
GO0030032 LAMELLIPODIUM BIOGENESIS	[GO0030032:(CLASS:biological_process)lamellipodium biogenesis]Formation of a lamellipodium, a thin sheetlike extension of the surface of a migrating cell.	17	-1.24605
GO0032760 POSITIVE REGULATION OF TUMOR NECROSIS FA	[GO0032760:(CLASS:biological_process)positive regulation of tumor necrosis factor production]Any process that activates or increases the frequency, rate, or extent of tumor necrosis factor production.	7	-1.17359
GO0002238 RESPONSE TO MOLECULE OF FUNGAL ORIGIN	[GO0002238:(CLASS:biological_process)response to molecule of fungal origin]A change in state or activity of an organism (in terms of movement, secretion, enzyme production, gene expression, etc.) as a result of the detection of molecules of fungal origin such as chito-octomer oligosaccharide.	3	-1.07603
GO0006595 POLYAMINE METABOLIC PROCESS	[GO0006595:(CLASS:biological_process)polyamine metabolic process]The chemical reactions and pathways involving polyamines, any organic compound containing two or more amino groups.	4	-1.04471
GO0048703 EMBRYONIC VISCEROCRANIUM MORPHOGENESIS	[GO0048703:(CLASS:biological_process)embryonic viscerocranium morphogenesis]The process by which the anatomical structures of viscerocranium are generated and organized during the embryonic phase. Morphogenesis pertains to the creation of form. The viscerocranium is the part of the skull comprising the facial bones.	3	-1.01256
GO0006098 PENTOSE PHOSPHATE SHUNT	[GO0006098:(CLASS:biological_process)pentose-phosphate shunt]The process by which glucose is oxidized, coupled to NADPH synthesis. Glucose 6-P is oxidized with the formation of carbon dioxide (CO2), ribulose 5-phosphate and reduced NADP; ribulose 5-P then enters a series of reactions interconverting sugar phosphates. The pentose phosphate pathway is a major source of reducing equivalents for bios…	7	-0.999751
GO0045576 MAST CELL ACTIVATION	[GO0045576:(CLASS:biological_process)mast cell activation]The change in morphology and behavior of a mast cell resulting from exposure to a cytokine, chemokine, soluble factor, or to (at least in mammals) an antigen which the mast cell has specifically bound via IgE bound to Fc-epsilonRI receptors.	5	-0.999525
GO0006183 GTP BIOSYNTHETIC PROCESS	[GO0006183:(CLASS:biological_process)GTP biosynthetic process]The chemical reactions and pathways resulting in the formation of GTP, guanosine triphosphate.	8	-0.976776
GO0006228 UTP BIOSYNTHETIC PROCESS	[GO0006228:(CLASS:biological_process)UTP biosynthetic process]The chemical reactions and pathways resulting in the formation of UTP, uridine (5'-)triphosphate.	8	-0.976776
GO0006241 CTP BIOSYNTHETIC PROCESS	[GO0006241:(CLASS:biological_process)CTP biosynthetic process]The chemical reactions and pathways resulting in the formation of CTP, cytidine 5'-triphosphate.	8	-0.976776
GO0015986 ATP SYNTHESIS COUPLED PROTON TRANSPORT	[GO0015986:(CLASS:biological_process)ATP synthesis coupled proton transport]The transport of protons across a membrane to generate an electrochemical gradient (proton-motive force) that powers ATP synthesis.	32	-0.944043
GO0040008 REGULATION OF GROWTH	[GO0040008:(CLASS:biological_process)regulation of growth]Any process that modulates the frequency, rate or extent of the growth of all or part of an organism so that it occurs at its proper speed, either globally or in a specific part of the organism's development.	5	-0.85937
GO0006983 ER OVERLOAD RESPONSE	[GO0006983:(CLASS:biological_process)ER overload response]The series of molecular signals generated by the accumulation of normal or misfolded proteins in the endoplasmic reticulum and leading to activation of transcription by NF-kappaB.	4	-0.829534
GO0042168 HEME METABOLIC PROCESS	[GO0042168:(CLASS:biological_process)heme metabolic process]The chemical reactions and pathways involving heme, any compound of iron complexed in a porphyrin (tetrapyrrole) ring.	3	-0.74124
GO0006446 REGULATION OF TRANSLATIONAL INITIATION	[GO0006446:(CLASS:biological_process)regulation of translational initiation]Any process that modulates the frequency, rate or extent of translational initiation.	18	-0.647385
GO0045061 THYMIC T CELL SELECTION	[GO0045061:(CLASS:biological_process)thymic T cell selection]The process of T cell selection that occurs in the thymus.	4	-0.576155
GO0016071 MRNA METABOLIC PROCESS	[GO0016071:(CLASS:biological_process)mRNA metabolic process]The chemical reactions and pathways involving mRNA, messenger RNA, which is responsible for carrying the coded genetic 'message', transcribed from DNA, to sites of protein assembly at the ribosomes.	23	-0.563731
GO0042254 RIBOSOME BIOGENESIS AND ASSEMBLY	[GO0042254:(CLASS:biological_process)ribosome biogenesis and assembly]The process of the formation of the constituents of the ribosome subunits, their assembly, and their transport to the sites of protein synthesis.	84	-0.542904
GO0051382 KINETOCHORE ASSEMBLY	[GO0051382:(CLASS:biological_process)kinetochore assembly]The aggregation and bonding together of a set of components to form the kinetochore, a multisubunit complex that is located at the pericentric region of DNA and provides an attachment point for the spindle microtubules.	3	0.481355
GO0007093 MITOTIC CELL CYCLE CHECKPOINT	[GO0007093:(CLASS:biological_process)mitotic cell cycle checkpoint]A signal transduction-based surveillance mechanism that ensures accurate chromosome replication and segregation by preventing progression through a mitotic cell cycle until conditions are suitable for the cell to proceed to the next stage.	9	0.829277
GO0050877 NEUROLOGICAL PROCESS	[GO0050877:(CLASS:biological_process)neurological process]The processes pertaining to the functions of the nervous system of an organism.	5	0.913354
GO0051301 CELL DIVISION	[GO0051301:(CLASS:biological_process)cell division]The processes resulting in the physical partitioning and separation of a cell into daughter cells.	195	0.978162
GO0048149 BEHAVIORAL RESPONSE TO ETHANOL	[GO0048149:(CLASS:biological_process)behavioral response to ethanol]A change in the behavior of an organism as a result of an ethanol stimulus.	3	1.33256
GO0006695 CHOLESTEROL BIOSYNTHETIC PROCESS	[GO0006695:(CLASS:biological_process)cholesterol biosynthetic process]The chemical reactions and pathways resulting in the formation of cholesterol, cholest-5-en-3 beta-ol, the principal sterol of vertebrates and the precursor of many steroids, including bile acids and steroid hormones.	22	1.37468
GO0008306 ASSOCIATIVE LEARNING	[GO0008306:(CLASS:biological_process)associative learning]Learning by associating a stimulus (the cause) with a particular outcome (the effect).	10	1.58139
GO0006397 MRNA PROCESSING	[GO0006397:(CLASS:biological_process)mRNA processing]Any process involved in the conversion of a primary mRNA transcript into one or more mature mRNA(s) prior to translation into polypeptide.	196	1.64082
GO0006281 DNA REPAIR	[GO0006281:(CLASS:biological_process)DNA repair]The process of restoring DNA after damage. Genomes are subject to damage by chemical and physical agents in the environment (e.g. UV and ionizing radiations, chemical mutagens, fungal and bacterial toxins, etc.) and by free radicals or alkylating agents endogenously generated in metabolism. DNA is also damaged because of errors during its replicatio…	184	1.66886
GO0006259 DNA METABOLIC PROCESS	[GO0006259:(CLASS:biological_process)DNA metabolic process]The chemical reactions and pathways involving DNA, deoxyribonucleic acid, one of the two main types of nucleic acid, consisting of a long, unbranched macromolecule formed from one, or more commonly, two, strands of linked deoxyribonucleotides.	32	1.68489
GO0051028 MRNA TRANSPORT	[GO0051028:(CLASS:biological_process)mRNA transport]The directed movement of mRNA, messenger ribonucleic acid, into, out of, within or between cells.	56	1.70577
GO0009268 RESPONSE TO ACIDIC PH	[GO0009268:(CLASS:biological_process)response to pH]A change in state or activity of a cell or an organism (in terms of movement, secretion, enzyme production, gene expression, etc.) as a result of a pH stimulus.	4	1.76682
GO0001580 DETECTION OF CHEMICAL STIMULUS INVOLVED IN SENSORY PERCEPTION OF BITTER TASTE	[GO0001580:(CLASS:biological_process)detection of chemical stimulus during sensory perception of bitter taste]The series of events required for a bitter taste stimulus to be received and converted to a molecular signal.	4	1.85253
GO0008033 TRNA PROCESSING	[GO0008033:(CLASS:biological_process)tRNA processing]The process by which a pre-tRNA molecule is converted to a mature tRNA, ready for addition of an aminoacyl group.	50	1.85449
GO0050909 SENSORY PERCEPTION OF TASTE	[GO0050909:(CLASS:biological_process)sensory perception of taste]The series of events required for an organism to receive a gustatory stimulus, convert it to a molecular signal, and recognize and characterize the signal. Gustation involves the direct detection of chemical composition, usually through contact with chemoreceptor cells.	11	2.61567
