# Supplementary material for: Frailty in middle age is associated with frailty status and race-specific changes to the transcriptome
Source: Aging (Albany NY). 2019 Aug 8;11(15):5518–34. doi: 10.18632/aging.102135 (PMC6710041; doi:10.18632/aging.102135)
Supplement: Supplementary Table 6 [file aging-11-102135-s002.xlsx]

## Sheet: Table S5
Supplementary Table 6. Primer Sequences for RT-qPCR Validation
Gene	Forward Primers - Sequence	Reverse Primers - Sequence	Nucleotide ID
C17orf56	TTTCTACACCGGCTCCCGAT	CTGGTACAAGCTGTTCCCGT	NM_144679.2
CALCA	ATCTAAGCGGTGCGGTAATC	CTTGTTGAAGTCCTGCGTGT	XM_017018284.1
CCL5	GCTGTCATCCTCATTGCTACTG	TGGTGTAGAAATACTCCTTGATGTG	NM_001278736.1
CDKN1A	AGGGGACAGCAGAGGAAG	GCGTTTGGAGTGGTAGAAATCTG	NM_001291549.1
CXCL1	AACCGAAGTCATAGCCACAC	GTTGGATTTGTCACTGTTCAGC	NM_001511.3
CXCL2	CATCGAAAAGATGCTGAAAAATG	TTCAGGAACAGCCACCAATA	NM_002089.3
CXCL3	AAGTGTGAATGTAAGGTCCCC	GTGCTCCCCTTGTTCAGTATC	NM_002090.2
CXCR1	TGGCACGTCATCGTGTTACC	GCCAGATCACCTTCCACACA	NM_000634.2
EGR1	CTTCAACCCTCAGGCGGACA	GGAAAAGCGGCCAGTATAGGT	NM_001964.2
FAM116B	GGGTCTCTACAGGCGGTTTT	ATCCAGGTCTCGATGTTCGC	NM_001001794.3
FCGR3B	GTAACACGAGGAAGGGCTCC	GCCTGGCTTGAGATGAGGTT	NM_001127596.1
FPR2	AGTCTGCTGGCTACACTGTTC	TGGTAATGTGGCCGTGAAAGA	NM_001005738.1
FPR3	AGGATCTAAGCTGGTGGTGT	GTGACTCCGTGGACTAGCA	NM_002030.4
GBP1	GTGGAACGTGTGAAAGCTGA	CAACTGGACCCTGTCGTTCT	NM_002053.2
HBB	GTGAACGTGGATGAAGTTGGTGGTGAG	TTGGACAGCAAGAAAGCGAGCTTAGTG	NM_000518.4
ICAM1	GTGGTAGCAGCCGCAGTC	GGCTTGTGTGTTCGGTTTCA	NM_000201.2
IFI44	CCACCGAGATGTCAGAAAGAG	TGGTACATGTGGCTTTGCTC	XM_011540516.3
IFI44L	TATCACCAGCATAACCGAGC	CTGTCCTTCAGAGATGGAGA	XM_017000120.2
IFIT1	GATCTCAGAGGAGCCTGGCTAA	TGATCATCACCATTTGTACTCATGG	NM_001548.4
IFIT3	TCATGAGTGAGGTCACCAAG	CCTCGTTGTTACCATCTAGG	NM_001549.5
IL15RA	CGCTGGGCTCAGCATCTC	AGCTGCTCTGCACACATGGA	NM_001351097.1
IL1B	ACAGATGAAGTGCTCCTTCCA	GTCGGAGATTCGTAGCTGGAT	XM_017003988.1
IL6	ATGAACTCCTTCTCCACAAGC	GTTTTCTGCCAGTGCCTCTTTG	XM_011515390.2
IRF4	AGCGCATTTCAGTAAATGTAAACACAT	TCTTGTGTTCTGTAGACTGCCATCA	NM_001195286.1
LRCH3	TCATGTGCGACCTCGATCTG	TGTCTGTCCACTGTGCTTAAC	NM_032773.3
MAPKAPK2	CAGCAGTTCCCGCAGTTC	CGAATTTCTCCTGGGTCCTC	XM_005273353.3
NOTCH1	GAACCAATACAACCCTCTGC	AGCTCATCATCTGGGACAGG	NM_017617.5
OAS3	CCGAACTGTCCTGGGCCTGATCC	CCCATTCCCCAGGTCCCATGTGG	XM_017019363.2
OSM	GCCCAGGATTTGGAGAGGTCTGG	GCGATGGTAGCCATGCAGGAACCT	NM_001319108.1
PF4	TTCTGCGCCTCACGCCC	TGGGACGGACCTGG GAG	NM_001363352.1
PTGS2	ATATGTTCTCCTGCCTACTGGAA	GCCCTTCACGTTATTGCAGATG	NM_000963.3
RARA	GGTGCCTCCCTACGCCTTCT	AGAGGGCAGGGAAGGTTTCC	NM_000964.3
RSAD2	AGGTTCTGCAAAGTAGAGTTGC	GATCAGGCTTCCATTGCTC	NM_080657.4 Homo
SLC2A6	CAGAGCAGCCGAGTATCGTG	AAACATGATGGCCGCTGAGA	NM_017585.3
TNF	CCCAGGGACCTCTCTCTAATCA	AGCTGCCCCTCAGCTTGAG	NM_000594.3
TRIM25	GTCTCTACCCAGAACAGTTTCC	ATCCAACACAGGCTGATTCC	NM_005082.4
