# Supplementary material for: Frailty in middle age is associated with frailty status and race-specific changes to the transcriptome
Source: Aging (Albany NY). 2019 Aug 8;11(15):5518–34. doi: 10.18632/aging.102135 (PMC6710041; doi:10.18632/aging.102135)
Supplement: Supplementary Table 7 [file aging-11-102135-s001.xlsx]

## Sheet: Table S1
	Supplementary Table 7. FRAIL scores among frail individuals in the validation cohort
		Blacks	Whites	p value
	n	13	13
	Fatigue (mean (sd))	0.69 (0.48)	0.85 (0.38)	0.372
	Resistance (mean (sd))	1.00 (0.00)	0.85 (0.38)	0.153
	Ambulation (mean (sd))	0.92 (0.28)	0.92 (0.28)	1
	Illness (mean (sd))	0.08 (0.29)	0.17 (0.39)	0.557
	Loss of Weight (mean (sd))	0.46 (0.52)	0.54 (0.52)	0.709
